# Supplementary material
Source: PubMed Central journal article supplement (PMC8212422)
Supplement: NIHMS1708116-supplement-Zhou_et_al__Supplement.pdf [file NIHMS1708116-supplement-Zhou_et_al__Supplement.pdf]

## Supplementary Materials for

### Estrogen receptor $\alpha$ controls metabolism in white and brown adipocytes by regulating *Polg1* and mitochondrial remodeling

Zhenqi Zhou, Timothy M. Moore, Brian G. Drew, Vicent Ribas, Jonathan Wanagat, Mete Civelek, Mayuko Segawa, Dane M. Wolf, Frode Norheim, Marcus M. Seldin, Alexander R. Strumwasser, Kate A. Whitney, Ellen Lester, Britany R. Reddish, Laurent Vergnes, Karen Reue, Prashant Rajbhandari, Peter Tontonoz, Jason Lee, Sushil K. Mahata, Sylvia C. Hewitt, Orian Shirihai, Craig Gastonbury, Kerrin S. Small, Markku Laakso, Jorgen Jensen, Sindre Lee, Christian A. Drevon, Kenneth S. Korach, Aldons J. Lusis, Andrea L. Hevener\*

\*Corresponding author. Email: ahevener@mednet.ucla.edu

Published 5 August 2020, *Sci. Transl. Med.* **12**, eaax8096 (2020)

DOI: 10.1126/scitranslmed.aax8096

#### The PDF file includes:

##### Materials and methods

Fig. S1. Overview of the human and mouse studies included in this investigation.

Fig. S2. Characteristics of male and female FERKO mice.

Fig. S3. Expression analyses performed on adipose tissue samples from men participating in the MyoGlu studies.

Fig. S4. The impact of *Esr1* loss and gain of expression on parkin and p53 cellular localization.

Fig. S5. Mitochondrial membrane potential in 3T3L1 adipocytes in the presence or absence of *Esr1*.

Fig. S6. ER $\alpha$  protein expression in gonadal and inguinal adipose tissue of BAT-specific ER $\alpha$  KO mice (ER $\alpha$ KO<sup>BAT</sup>).

Fig. S7. LC3B expression is reduced in BAT from ER $\alpha$ KO<sup>BAT</sup> mice.

Fig. S8. Schematic overview of the mechanisms by which ER $\alpha$  controls adipocyte metabolism and adiposity.

Table S1. Genes significantly correlated with *ESR1/Esr1* and overlapping between the METSIM, MyoGlu, and HMDP studies.

Table S2. Genes associated with *Esr1* in gWAT from male and female C57BL/6J mice.

Table S3. Mitochondrial-associated genes differentially expressed in gWAT from female FERKO versus Control<sup>f/f</sup> mice.

Table S4. Mouse strains studied from the UCLA HMDP.

Table S5. qPCR primers used to assess gene expression in adipose tissue from WT C57BL/6J, *Esr1* Control<sup>f/f</sup>, FERKO, and ER $\alpha$ KO<sup>BAT</sup> mice.

Table S6. qPCR primers used for ChIP studies to assess the binding of ER $\alpha$  to the *Polg1* proximal promoter in 3T3L1 adipocytes.

Legends for data files S1 to S6

**Other Supplementary Material for this manuscript includes the following:**

(available at [stm.sciencemag.org/cgi/content/full/12/555/eaax8096/DC1](http://stm.sciencemag.org/cgi/content/full/12/555/eaax8096/DC1))

Data file S1 (Microsoft Excel format). Raw data from studies of human tissues, cells, and genetically engineered mice.

Data file S2 (Microsoft Excel format). Raw data of *ESR1*-correlated genes in subcutaneous fat from men participating in the METSIM study.

Data file S3 (Microsoft Excel format). Raw data of *ESR1*-correlated genes in subcutaneous fat from men participating in the MyoGlu study.

Data file S4 (Microsoft Excel format). Raw data of *Esr1*-correlated genes in gonadal fat from male mice of the UCLA HMDP.

Data file S5 (Microsoft Excel format). Raw data of *Esr1*-correlated genes in gonadal fat from female mice of the UCLA HMDP.

Data file S6 (Microsoft Excel format). GO of microarray data performed on gonadal fat from female FERKO and Control<sup>f/f</sup> mice.

## Materials and methods

### Immunoblot analysis

Whole quadriceps muscles from both legs were pulverized together into a powder while frozen in liquid nitrogen and a homogenous sample of pulverized muscle was used for immunoblotting. Proteins from each individual whole cell homogenate were normalized (expressed relative to the pixel densitometry) to glyceraldehyde 3-phosphate dehydrogenase (GAPDH, AM4300, Ambion). Phosphorylation-specific proteins were normalized (expressed relative to pixel densitometry) to the same unphosphorylated protein (i.e. phosphorylated Drp1 at Ser 616 was expressed relative to the pixel densitometry of Drp1 for each individual sample). Primary antibodies included: Mitochondrial Fission Protein 1 (Fis1, GTX111010, GeneTex), Mitochondrial fission factor (MFF, ab81127, Abcam), Mitofusin 1 (MFN1, 75-162, NeuroMab), Mitofusin2 (MFN2, ab56889, Abcam), Transcription factor A, Mitochondrial (TFAM, ab131607, Abcam), Dynamin-related protein 1 (Drp1, 8570, Cell Signaling), phosphorylated Drp1 Ser616 (4494, Cell Signaling), phosphorylated Drp1 Ser637 (6319, Cell Signaling), OxPhos Complex I to V (ab110413, Abcam), Optic atrophy 1 (Opa1, 612606, BD Biosciences), PTEN Induced Putative Kinase 1 (Pink1, 10006283, Cayman Chemical), Parkin (2132, Cell Signaling), phosphorylated Parkin Ser65 (ab154995, Abcam), Microtubule-associated proteins 1A/1B light chain 3B (LC3B, 2775, Cell Signaling), Sequestosome 1 (p62, 5114, Cell Signaling), Beclin-1 (3738, Cell Signaling), Autophagy Related 7 (ATG7, 8558, Cell Signaling), Protein Kinase A (PKA, 4782, Cell Signaling), Autophagy Related 10 (ATG10, PA5-20454, ThermoFisher), phospho-AMPK $\alpha$  Thr172 (50081, Cell Signaling), PGC1 $\alpha$  (2178, Cell Signaling), and phospho-PKA Thr197 (5661, Cell Signaling). In some cases immunoblots were stripped and re-probed with a different antibody; thus, loading controls in specific instances were duplicated between panels.

### DNA & RNA extraction, cDNA synthesis, quantitative RT-PCR, and microarrays

DNA and RNA were extracted from a portion of frozen adipose tissue homogenate (gonadal and inguinal white adipose tissue and interscapular brown adipose tissue) using DNeasy/RNeasy isolation kits (Qiagen) as described by the manufacturer. Isolated DNA and RNA were tested for concentration and purity using a NanoDrop Spectrophotometer (Thermo Scientific). Isolated RNA was converted into cDNA, checked for purity, and qPCR of the resulting cDNA was performed (1). All genes were normalized to the housekeeping gene Ppia or 18S. Mitochondrial DNA content was assessed as a ratio of mitochondrial DNA (mtCO2) to nuclear DNA (SDHA). See **table S5** for a list of qPCR primers. MtDNA copy number from human adipose tissue was deep sequenced and aligned reads origin from the human mitochondrial chromosome (37 genes), quantified (normalized) copy numbers and compared them between dysglycemic and normoglycemic men. We used the Rsubread package in R. Total DNA was extracted from cells using DNeasy Blood and Tissue kit (Qiagen). Expression of mtCO3 for mtDNA and 18S for nuclear DNA was assessed by real-time qPCR. The ratio of mtDNA (mtCO3) to nuDNA (18S) was used as an estimate for comparison of mtDNA content between the genotypes.

Total RNA from HMDP mouse muscle (211 females, 228 males) was hybridized to Affymetrix HT\_MG-430A arrays and scanned using standard Affymetrix protocols. To reduce spurious association, RMA normalization was performed after removing all individual probes with SNPs and all probesets including 8 or more SNP-containing probes, resulting in 22,416 remaining probesets. To determine the accuracy of microarray data, qPCR was used to test the expression of a dozen genes. A correlation of  $r = 0.7$  between qPCR and microarrays was

determined. Frozen human adipose tissue biopsies were cooled in liquid nitrogen and crushed to powder by a pestle in a liquid nitrogen-cooled mortar as described by Langleite et al. (64). Frozen biopsies were transferred into 1 mL QIAzol Lysis Reagent (Qiagen), and homogenized using TissueRuptor (Qiagen) at full speed for 15 sec, twice. Total RNA was isolated from the homogenate using RNeasy Mini Kit (Qiagen). RNA integrity and concentration were determined using Agilent RNA 6000 Nano Chips on a Bioanalyzer 2100 (Agilent Technologies Inc). Using High-Capacity cDNA Reverse Transcription Kit (Applied Biosystems), 200 ng of total RNA was converted to cDNA for TaqMan real-time RT-PCR. The cDNA reaction mixture was diluted in water and cDNA equivalent of 25 ng RNA used for each sample. Quantitative real-time PCR was performed with reagents and instruments from Applied Biosystems in the 96 well format using a 7900HT Fast instrument and the SDS 2.3 software (Applied Biosystems). Relative target mRNA expression levels were calculated as  $2^{-\Delta Ct}$ , and normalized to beta-2 microglobulin (B2M, Hs00984230\_m1) (63). mRNA sequencing was performed using the Illumina HiSeq 2000 system (Illumina). cDNA sequenced read alignment was carried out using Tophat v2.0.8. Reads counted by gene feature were performed by featureCounts in Rsubread 1.14.2.

### **Tissue histology**

White (gonadal) and brown adipose tissue (interscapular) depots from Control ER $\alpha$ KO models were fixed in formalin, sectioned and stained as previously described (8). Adipocyte nuclei and total adipocyte number and size were counted or measured using ImageJ software.

### **Mitochondrial isolation**

Mitochondria were isolated from gastrocnemius muscle using a Dounce homogenizer and Mitochondria Isolation Kit for Tissue (Thermo Scientific) with a Percoll density method for added purification. Briefly, gastrocnemius muscles were washed in ice-cold PBS, Dounce homogenized, and centrifuged at 800g for 10 min at 4°C. The supernatant was centrifuged at 12,000g for 15 min at 4°C. The pellet was washed and purified using isolation buffer and Percoll solution. Isolated mitochondria were mixed with lysis buffer (200  $\mu$ L, 12 mM sodium lauroyl sarcosine, 0.5% sodium deoxycholate, 50 mmol/L triethylammonium bicarbonate (TEAB)), then subjected to bath sonication for 10 min (Bioruptor Pico, Diagenode Inc.) and heated (95°C for 5 min).

### **Real-time respirometry of adipocytes**

Scrambled control (Scr) and *Esr1*-KD 3T3L1 fibroblasts were seeded in 24-well Seahorse plates (Seahorse Biosciences) and differentiated to adipocytes. Mitochondrial respiration in adipocytes was measured using an XF24 Extracellular Flux Analyzer (Seahorse Biosciences). Measurements of oxygen consumption were made continuously while cells were sequentially treated with oligomycin (ATP synthase inhibitor), FCCP (an uncoupling agent), and rotenone/myxothiazol (inhibitors of complex I/III of the electron transport chain)(28).

### **Confocal microscopy**

3T3-L1 cells were grown and differentiated in CELLview 4-compartment glass-bottom tissue culture dishes (Greiner Bio-One), PS, 35/10 mm. After 7 days of differentiation, 100 nM of Mtpagy Dye (Dojindo Molecular Technologies Inc.) or 1 mM of LysoTracker Green (Invitrogen) was added and cultured with preadipocytes for 30 minutes separately. Cells were imaged immediately with the alpha Plan-Apochromat 100 $\times$ 1.46 Oil DIC M27 objective on the Zeiss LSM 880 with Airyscan. Before image analysis, raw.czi files were automatically processed into

deconvoluted Airyscan images using the Zen software. Images were analyzed in Fiji (ImageJ, NIH). The areas and numbers of lysosomes and mitolysosomes were quantified. Briefly, 2-channel Airyscan images of lysosomes and mitolysosomes were subjected to a background subtraction with a rolling ball filter = 50; individual cells were cropped from larger fields, followed by thresholding, segmentation, and measurement.

## ChIP

Stable ER $\alpha$ -expressing 3T3L1 cells (described above) were used for ChIP experiments. Cells were grown to confluence and at day 3 of differentiation were treated for 60 minutes with vehicle or 10 nM  $\beta$ -estradiol. Cells were harvested and ChIP analyses were performed as previously described (8, 28) using an antibody against ER $\alpha$  (ab32063, Abcam). Primers for detection of the Polg1 promoter by qPCR are listed in the **table S6**.

## Transmission electron microscopy

Brown adipose tissue sections were fixed with freshly prepared pre-warmed (37°C) fixative containing 2.5% glutaraldehyde and 2% paraformaldehyde in 0.15 M cacodylate buffer. After fixation, tissues were processed for TEM analysis as described previously (27). Ultrathin (~60 nm) sections were viewed using a JEOL 1200EX II (JEOL) electron microscope and photographed by digital camera (Gatan). Micrographs were obtained for Control<sup>ff</sup> vs. ER $\alpha$ KO<sup>BAT</sup> brown adipose tissue samples.

## FDG positron emission tomography-computed tomography imaging

PET tracers, <sup>18</sup>F-fluorodeoxyglucose (FDG) and <sup>18</sup>F-2-deoxy-2-fluoroarabinos (DFA), were synthesized as previously described. <sup>18</sup>F-FDG was obtained from the UCLA Translational Imaging Division. Mice were injected with ExiTron nano 12,000 (100 $\mu$ L), 3d before the PET imaging experiment. Mice were anesthetized, injected with ~2.96 MBq of <sup>18</sup>F-FDG (after overnight fast) or <sup>18</sup>F-DFA, and after 60 min imaged for 10 min on a G8 PET/CT (SOFIE Biosciences). Different groups of littermate mice were used for the room temperature vs. cold tolerance testing (4°C for 4h) studies. A blinded observer, unaware of the intervention groups, performed the PET quantification using only the CT image to examine the regions of interest. <sup>18</sup>F-DFA and <sup>18</sup>F-FDG accumulation were normalized to the respective accumulation in the brain and right forelimb triceps. Brain was selected as a reference region for the quantification of <sup>18</sup>F-DFA accumulation as specific accumulation of <sup>18</sup>F-DFA in the brain has never been observed, and the same brain region could be readily identified and quantified across individual animals. Image-derived blood <sup>18</sup>F-DFA was quantified from the left ventricle. Hepatic <sup>18</sup>F-DFA contrast, correlation, and entropy were determined using the GLCM Texture plugin in ImageJ (version 1.50i).

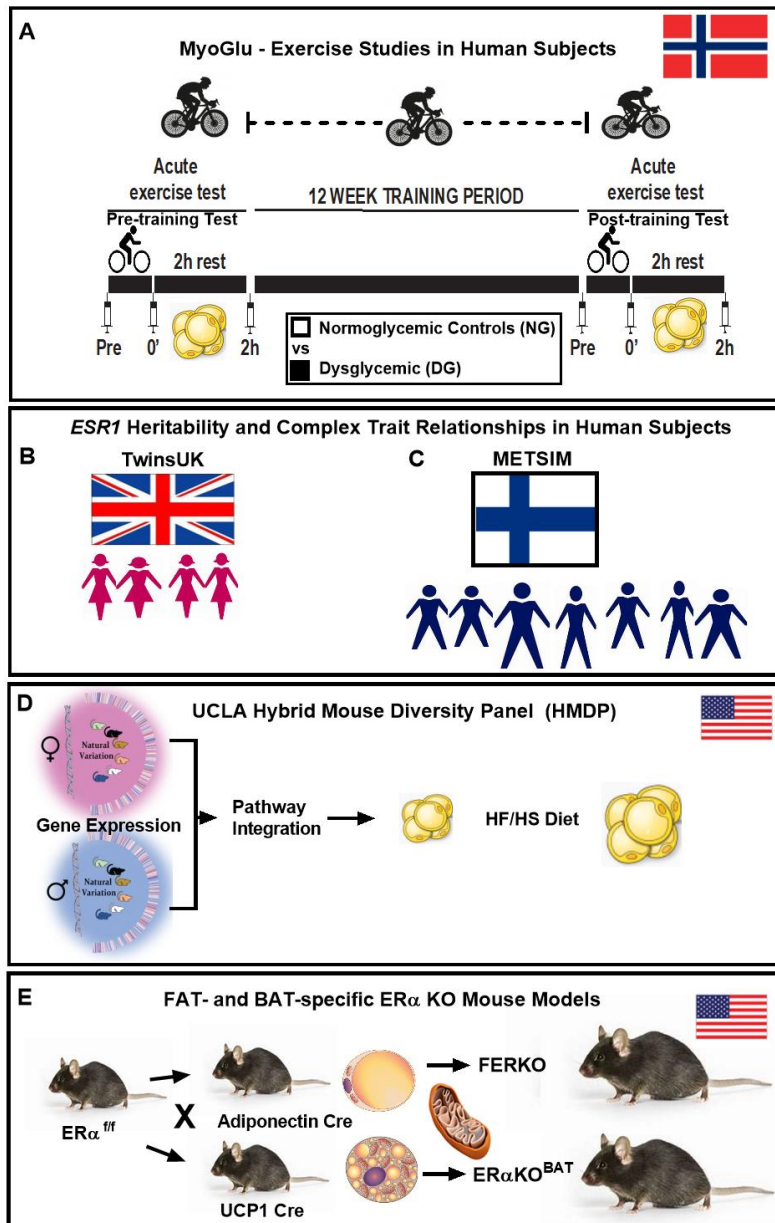

**Fig. S1. Overview of the human and mouse studies included in this investigation.** (A) MyoGlu exercise studies (two endurance and 2 strength training sessions, 60 min each, 4 x per week) in 13 normoglycemic (NG) and 13 dysglycemic (DG) men of age 40-65 years, with adipose tissue samples excised before and after training(2, 14-16). (B) TwinsUK, a study of ~766 healthy female monozygotic and dizygotic twins ages 38-85 years (median age 62, ~75% postmenopausal by FNP calculation)(12, 13). Adipose tissue samples were harvested and gene expression was determined by RNAseq. (C) METSIM studies in Finnish men (n=8,460) age 45-70 years included adipose tissue gene expression determined by Affymetrix microarrays and correlated with complex traits in n=770 subjects(17-19). (D) Studies of the UCLA Hybrid Mouse Diversity Panel (HMDP) comprised of 100 inbred and recombinant inbred male and female mice under normal chow (NC) and high fat-high sucrose (HF-HS) diet in the sedentary condition (4 mice per strain / per condition; 12 weeks of age)(20, 21). (E) Studies in male and female white (WAT) and brown (BAT) adipose tissue-specific ER $\alpha$  knockout mice, FERKO and ER $\alpha^{KO^{BAT}}$ , respectively.

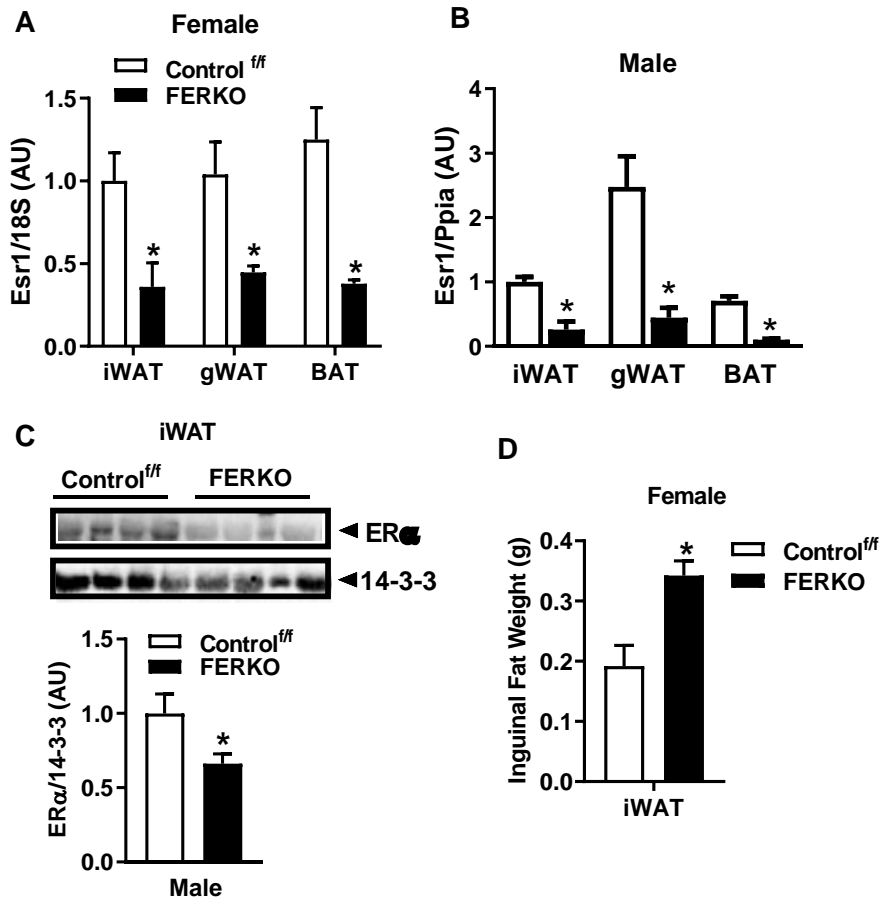

**Fig. S2. Characteristics of male and female FERKO mice.** (A-B) *Esr1* expression and (C) ER $\alpha$  protein in iWAT of female and male FERKO mice compared with Control<sup>ff</sup> (n=5-9/genotype). (D) Inguinal white adipose tissue (iWAT) weight in female FERKO mice vs. Control<sup>ff</sup> (n=5-7/genotype). Data are means  $\pm$  SEM. Student's t-test or one-way ANOVA, \* $P$  < 0.05 between genotype difference.

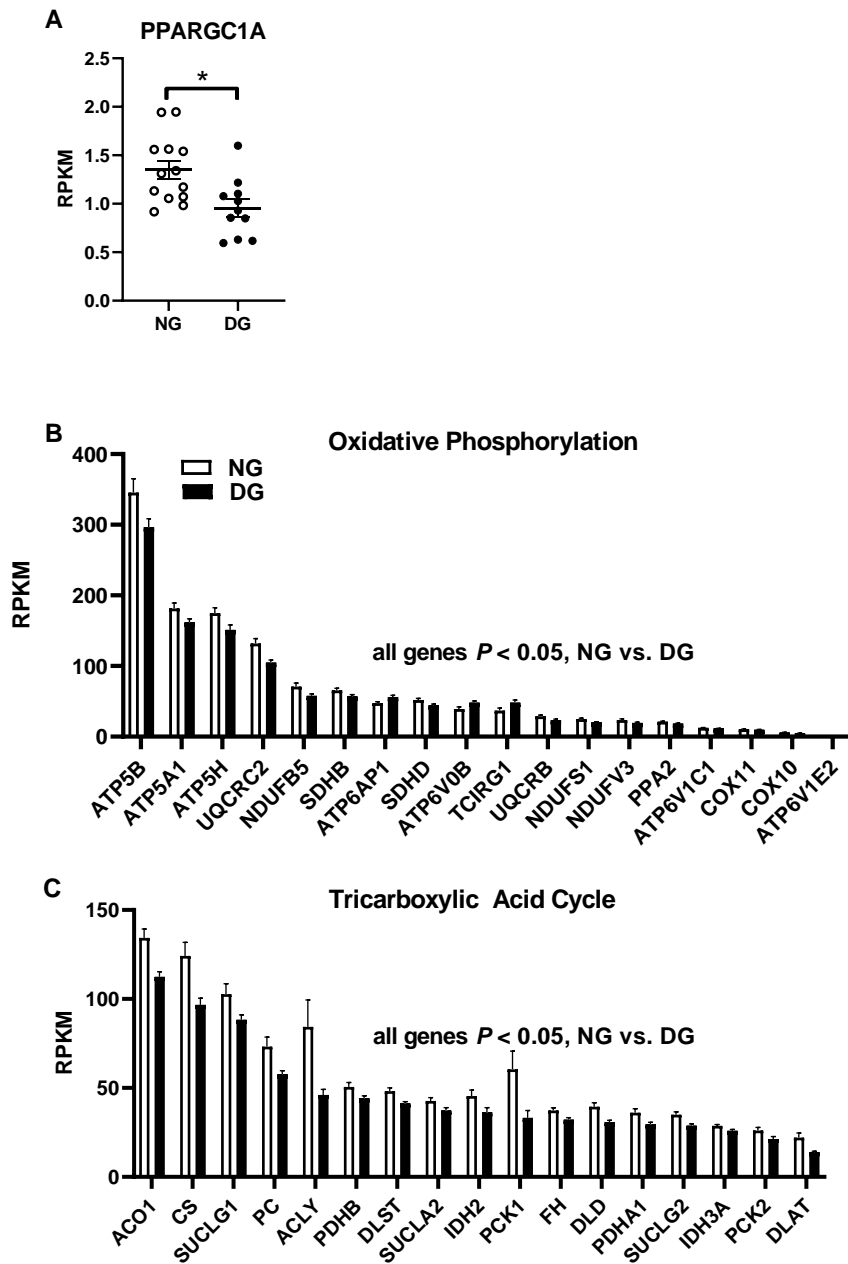

**Fig. S3. Expression analyses performed on adipose tissue samples from men participating in the MyoGlu studies.** Normoglycemic, NG vs. dysglycemic, DG; n=46 men aged 40-65 years. Adipose tissue expression of (A) PPARGC1A, and genes associated with (B) oxidative phosphorylation and the (C) tricarboxylic acid cycle. Values are means  $\pm$  SEM. Differences detected by Student's t-test or one-way ANOVA,  $*P < 0.05$  between genotype difference.



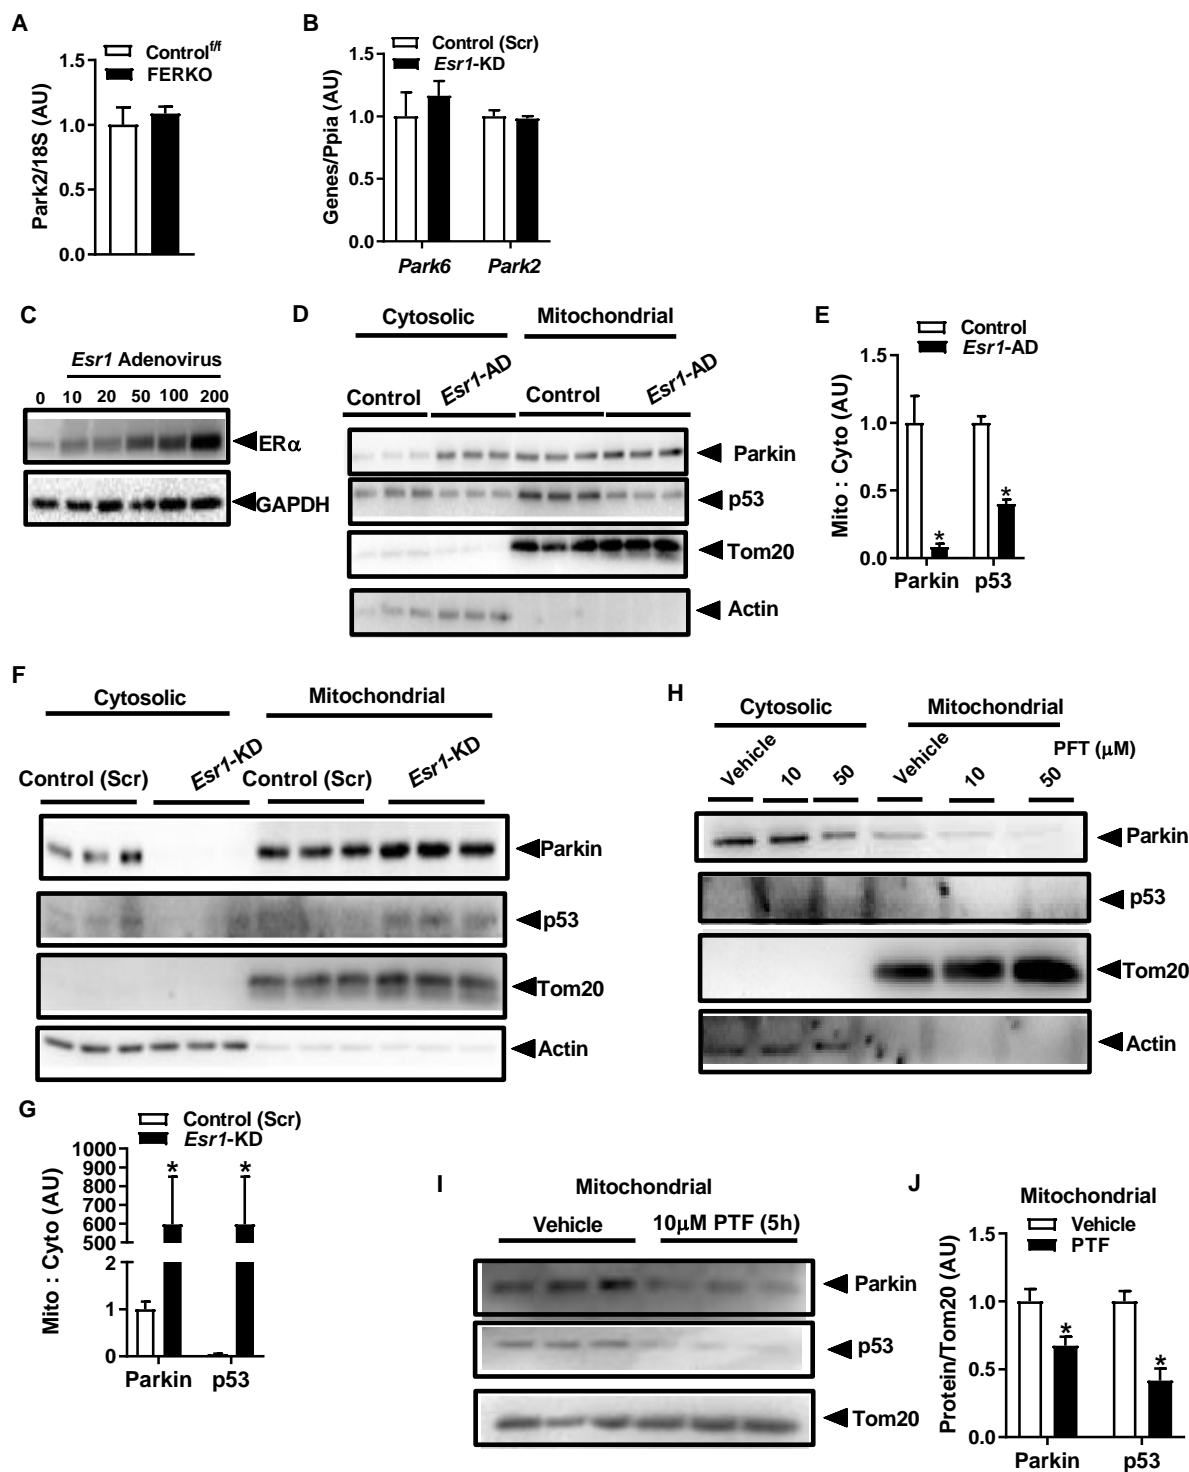

**Fig. S4. The impact of *Esr1* loss and gain of expression on parkin and p53 cellular localization.** (A) *Esr1* expression by increasing volumes of adenovirus in 3T3L1 adipocytes as represented by ER $\alpha$  immunoblotting. (B-C) *Esr1* overexpression on mitochondrial:cytosolic parkin and p53 relative to controls. (D-E) Knockdown of *Esr1* on the mitochondrial distribution of p53 and parkin compared with (Scr) controls. (F-H) The effect of p53 inhibitor Pifithrin- $\alpha$  (PFT 10 and 50 $\mu$ M, 5h) on the abundance of mitochondrial-associated p53 and parkin in control 3T3L1 adipocytes. Values are means  $\pm$  SEM. Differences detected by Student's t-test or one-way ANOV, \* $P$  < 0.05 between genotype difference.

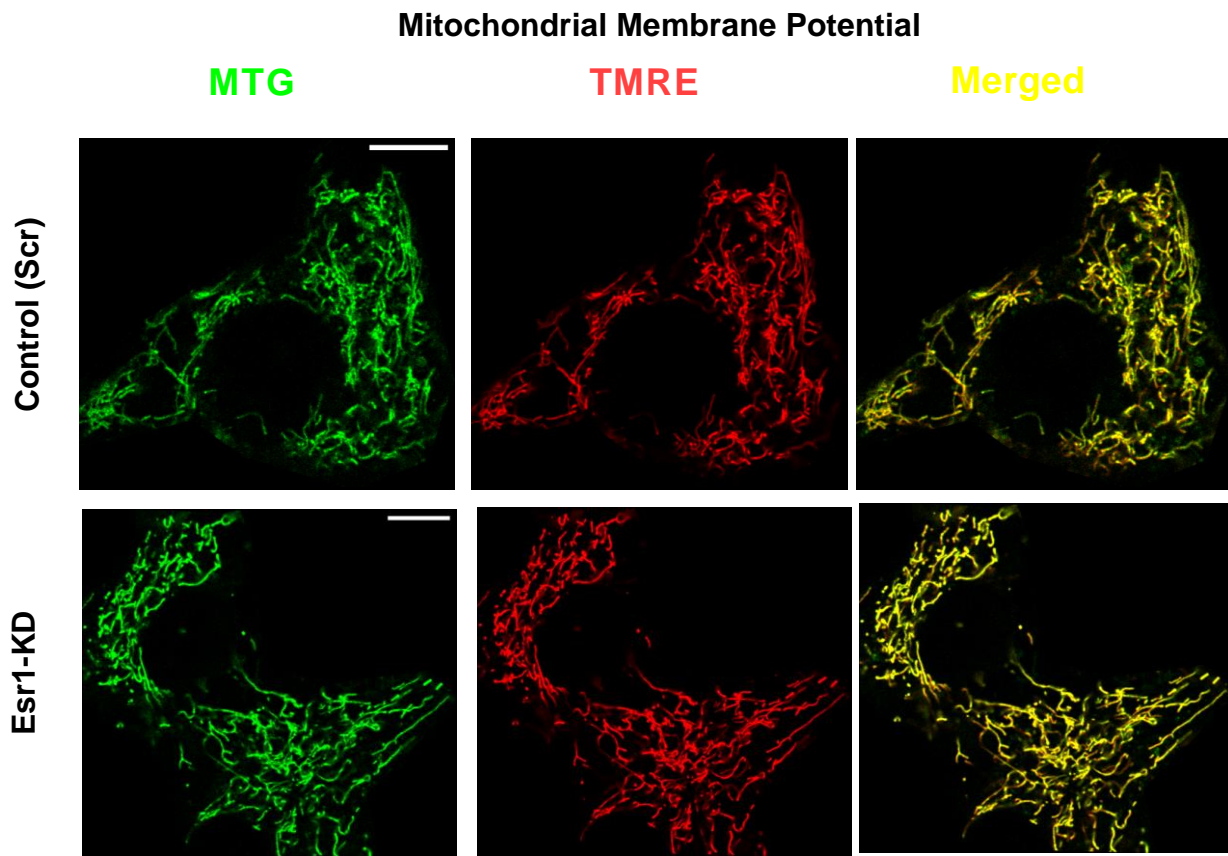

**Fig. S5. Mitochondrial membrane potential in 3T3L1 adipocytes in the presence or absence of *Esr1*.** Confocal microscopy analysis of mitochondrial membrane potential ( $\Delta\Psi_m$ ) determined by TMRE staining (middle panels) relative to MitoTracker Green (MTG; left panels) for the quantification of mitochondrial size in scrambled control (Scr) (top panels) vs. *Esr1*-KD (bottom panels) 3T3L1 adipocytes. Merged fluorescence presented in right panels.

### Brown Adipose Tissue-specific ER $\alpha$ KO

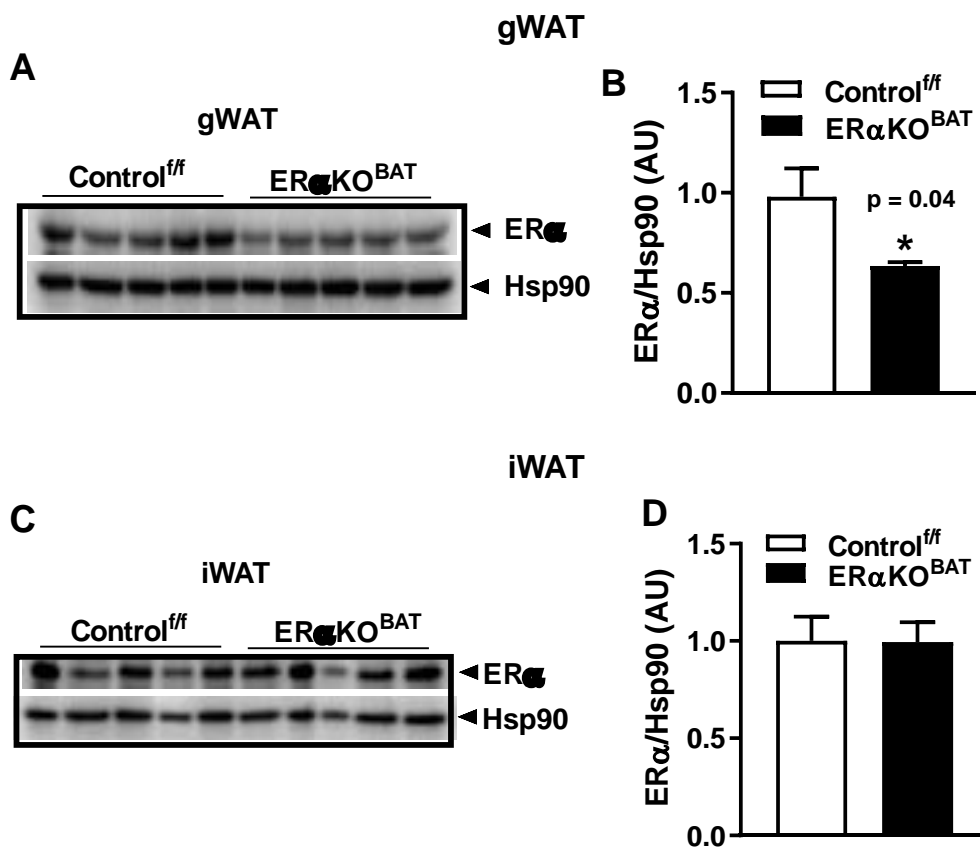

**Fig. S6. ER $\alpha$  protein expression in gonadal and inguinal adipose tissue of BAT-specific ER $\alpha$  KO mice (ER $\alpha$ KO<sup>BAT</sup>).** Immunoblots and densitometry of ER $\alpha$  in (A-B) gonadal adipose and (C-D) inguinal fat from ER $\alpha$ KO<sup>BAT</sup> vs. Control<sup>f/f</sup> (n=5/genotype). Values are means  $\pm$  SEM. Differences detected by Student's t-test, \* $P$  < 0.05 between genotype difference.

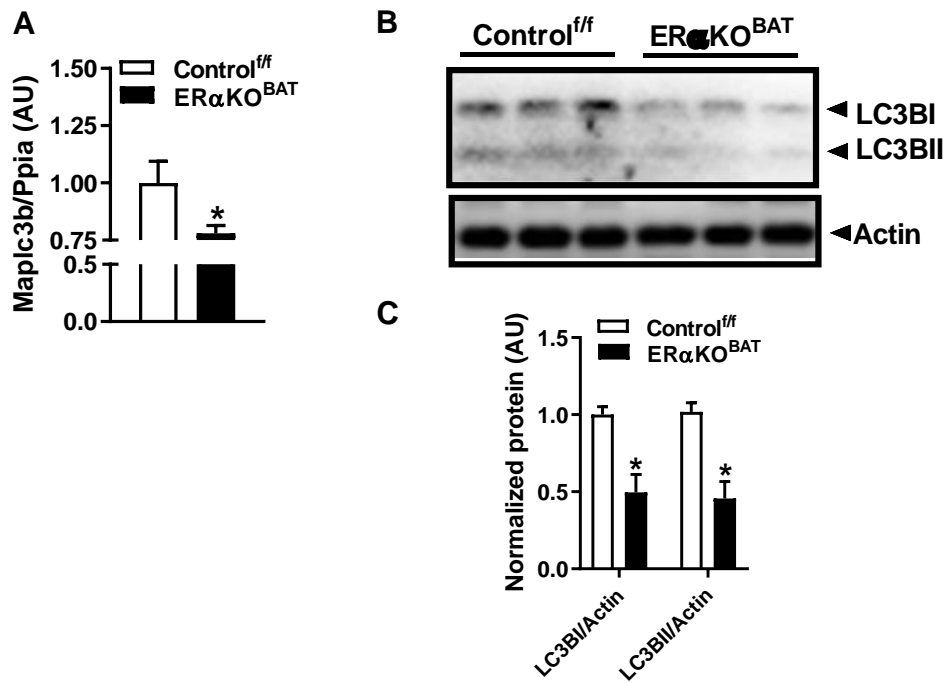

**Fig. S7. LC3B expression is reduced in BAT from ER $\alpha$ KO<sup>BAT</sup> mice.** (A) Maplc3b (gene that encodes LC3B) expression in BAT from female ER $\alpha$ KO<sup>BAT</sup> vs. Control f/f mice. (B-C) LC3BI/II protein levels in BAT of ER $\alpha$ KO<sup>BAT</sup> vs. Control<sup>f/f</sup> mice. Values are means  $\pm$  SEM. Differences detected by Student's t-test, \* $P$  < 0.05 between genotype difference.

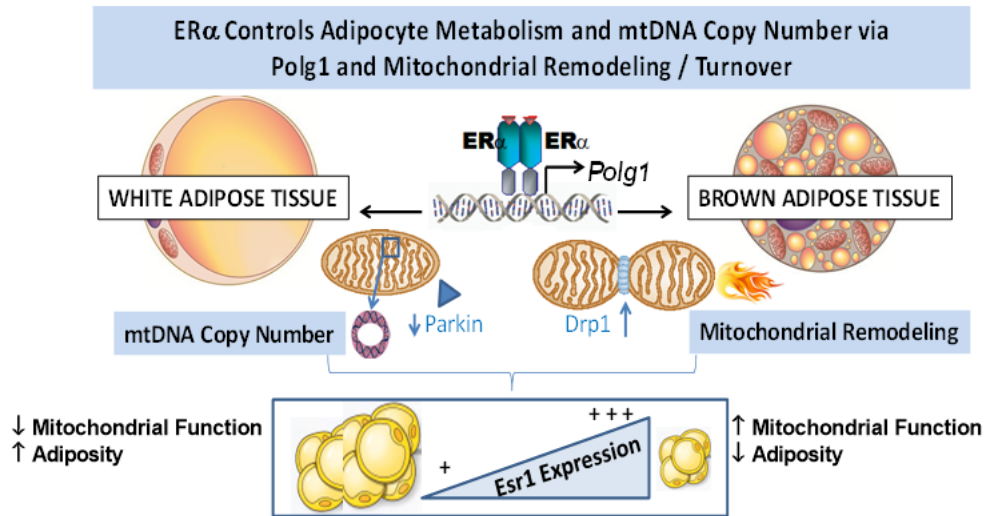

**Fig. S8. Schematic overview of the mechanisms by which ER $\alpha$  controls adipocyte metabolism and adiposity.** Collectively our findings show that the ER $\alpha$  target gene *Polg1* is reduced in expression in both white and brown adipocytes in the context of *Esr1* deletion. *Polg1*, via its role in the control of mtDNA replication, is intimately associated with fission-fusion-mitophagy dynamics. However the precise feedback from *Polg1* to the signaling nodes controlling mitochondrial remodeling and turnover appears to be adipocyte-specific. In white adipose tissue *Esr1* deletion reduced mtDNA copy number by heightened parkin-mediated mitophagic flux. In brown adipose tissue, *Esr1* deletion impaired mitochondrial fission via reduced Drp1 signaling. Impaired Drp1 signaling prevented fatty acid utilization and *Ucp1* induction during cold exposure. The alteration in mitochondrial fission signaling disrupted thermogenesis and glucose homeostasis. A loss of ER $\alpha$  from white or brown adipose tissue increased lipid deposition and adiposity. Our findings indicate that ER $\alpha$  combats obesity by controlling mitochondrial content and function in white and brown adipocytes.

**Table S1. Genes significantly correlated with *ESR1/Esr1* and overlapping between the METSIM, MyoGlu, and HMDP studies.** (Gene overlap reflected in Fig. 1K).

ACADSB  
ACTN1  
ANAPC5  
AP3M1  
API5  
ARPC2  
BAG3  
BAG4  
CAPN7  
CDT1  
CHPF2  
COL5A2  
DNAJA2  
DPM1  
ECHDC2  
GNA12  
GNAI1  
GPR137B  
LTBP2  
NEK6  
NLN  
OSBPL1A  
PCGF6  
PCK1  
PHF3  
PLA2G15  
RAB31  
RAD17  
RBM18  
SCN1A  
SENP2  
SLC25A4  
SLC31A2  
SLC39A1  
TERF2IP  
TMSB10  
VAMP2  
VAMP3  
VMA21  
YKT6

**Table S2. Genes associated with *Esr1* in gWAT from male and female C57BL6/J mice. (Overlap represented in Fig. 2A).**

| <b>Gene Symbol</b>   | <b>Female Bicolor</b> | <b>Female P-Value</b> | <b>Male Bicolor</b> | <b>Male P-Value</b> |
|----------------------|-----------------------|-----------------------|---------------------|---------------------|
| <i>Syne1</i>         | 0.46                  | 1.18E-12              | 0.27                | 4.84E-05            |
| <i>Syne1</i>         | 0.46                  | 1.18E-12              | 0.27                | 4.84E-05            |
| <i>Mrps2</i>         | 0.46                  | 1.41E-12              | 0.15                | 2.57E-02            |
| <i>Grb10</i>         | 0.45                  | 3.96E-12              | 0.34                | 1.36E-07            |
| <i>Pdpk1</i>         | 0.45                  | 4.55E-12              | 0.31                | 1.23E-06            |
| <i>Sfswap</i>        | 0.45                  | 5.97E-12              | 0.32                | 5.85E-07            |
| <i>Tmem158</i>       | -0.44                 | 3.28E-11              | -0.21               | 1.28E-03            |
| <i>Ikbkb</i>         | 0.43                  | 4.55E-11              | 0.25                | 1.68E-04            |
| <i>Bnip2</i>         | -0.43                 | 5.08E-11              | -0.05               | 4.16E-01            |
| <i>Ermp1</i>         | -0.43                 | 5.90E-11              | 0.01                | 8.90E-01            |
| <i>Lrr1</i>          | -0.43                 | 7.45E-11              | 0.06                | 3.95E-01            |
| <i>Capn7</i>         | -0.43                 | 7.81E-11              | -0.11               | 9.11E-02            |
| <i>Akap8l</i>        | 0.43                  | 9.34E-11              | 0.22                | 7.46E-04            |
| <i>Il18rap</i>       | -0.43                 | 9.37E-11              | -0.31               | 2.35E-06            |
| <i>Luzp1</i>         | -0.43                 | 1.03E-10              | 0.30                | 4.43E-06            |
| <i>Bag4</i>          | 0.42                  | 1.68E-10              | 0.35                | 4.66E-08            |
| <i>Clcc1</i>         | 0.42                  | 1.71E-10              | 0.23                | 3.53E-04            |
| <i>Gigyf1</i>        | 0.42                  | 2.11E-10              | 0.29                | 6.55E-06            |
| <i>Afp</i>           | -0.42                 | 2.17E-10              | -0.20               | 1.96E-03            |
| <i>Eral1</i>         | 0.42                  | 2.20E-10              | 0.27                | 3.43E-05            |
| <i>Mgme1</i>         | 0.42                  | 2.26E-10              | 0.17                | 8.11E-03            |
| <i>Car15</i>         | 0.42                  | 2.39E-10              | 0.28                | 1.74E-05            |
| <i>Myl12a</i>        | -0.42                 | 2.76E-10              | -0.08               | 2.54E-01            |
| <i>Ccdc47</i>        | 0.42                  | 2.89E-10              | 0.26                | 9.08E-05            |
| <i>Ppp6r2</i>        | 0.42                  | 3.14E-10              | 0.34                | 1.47E-07            |
| <i>Hoxa9</i>         | 0.41                  | 3.87E-10              | 0.21                | 1.66E-03            |
| <i>Zfp689</i>        | 0.41                  | 4.10E-10              | 0.29                | 6.27E-06            |
| <i>Slc9a8</i>        | 0.41                  | 4.67E-10              | 0.24                | 3.07E-04            |
| <i>Naa15</i>         | -0.41                 | 4.72E-10              | 0.00                | 9.96E-01            |
| <i>Tcn2</i>          | 0.41                  | 4.88E-10              | 0.08                | 2.58E-01            |
| <i>Pacsin3</i>       | 0.41                  | 5.02E-10              | 0.33                | 3.51E-07            |
| <i>Psmf1</i>         | 0.41                  | 5.04E-10              | 0.34                | 1.40E-07            |
| <i>Naip5</i>         | -0.41                 | 5.11E-10              | -0.45               | 9.33E-13            |
| <i>Crebzf</i>        | 0.41                  | 5.69E-10              | 0.12                | 6.30E-02            |
| <i>Ppm1a</i>         | 0.41                  | 5.89E-10              | 0.25                | 1.39E-04            |
| <i>Foxm1</i>         | -0.41                 | 6.22E-10              | -0.06               | 3.53E-01            |
| <i>Med12</i>         | 0.41                  | 6.56E-10              | 0.21                | 1.11E-03            |
| <i>Runx2</i>         | -0.41                 | 6.89E-10              | 0.22                | 9.91E-04            |
| <i>Tex16</i>         | 0.41                  | 7.62E-10              | 0.27                | 3.25E-05            |
| <i>4922502D21Rik</i> | -0.41                 | 8.13E-10              | -0.18               | 5.32E-03            |
| <i>Foxm1</i>         | -0.41                 | 8.35E-10              | -0.41               | 1.84E-10            |
| <i>Atp1a2</i>        | 0.41                  | 8.87E-10              | 0.24                | 2.70E-04            |
| <i>Pcbd1</i>         | -0.41                 | 9.08E-10              | 0.05                | 4.84E-01            |

|                      |       |          |       |          |
|----------------------|-------|----------|-------|----------|
| <i>Plagl2</i>        | 0.41  | 9.09E-10 | 0.20  | 2.68E-03 |
| <i>Eef1e1</i>        | -0.40 | 9.88E-10 | -0.35 | 4.19E-08 |
| <i>Rep15</i>         | 0.40  | 1.01E-09 | 0.22  | 8.30E-04 |
| <i>Siva1</i>         | 0.40  | 1.27E-09 | 0.23  | 4.09E-04 |
| <i>Chrd</i>          | 0.40  | 1.28E-09 | 0.36  | 2.40E-08 |
| <i>Cdk7</i>          | -0.40 | 1.33E-09 | -0.07 | 2.99E-01 |
| <i>Srsf9</i>         | -0.40 | 1.33E-09 | -0.28 | 1.84E-05 |
| <i>Ptpn11</i>        | 0.40  | 1.42E-09 | 0.35  | 3.82E-08 |
| <i>Mum1</i>          | 0.40  | 1.49E-09 | 0.34  | 1.84E-07 |
| <i>Slc27a1</i>       | 0.40  | 1.60E-09 | 0.15  | 2.47E-02 |
| <i>Nek6</i>          | -0.40 | 1.63E-09 | -0.26 | 8.56E-05 |
| <i>Tm2d3</i>         | 0.40  | 1.63E-09 | 0.25  | 1.52E-04 |
| <i>Txndc12</i>       | 0.40  | 1.97E-09 | 0.06  | 3.75E-01 |
| <i>Atp5g3</i>        | 0.40  | 2.31E-09 | 0.36  | 2.49E-08 |
| <i>Pdcd1</i>         | 0.40  | 2.37E-09 | 0.25  | 1.79E-04 |
| <i>Syne2</i>         | 0.40  | 2.39E-09 | 0.37  | 6.67E-09 |
| <i>Mrpl24</i>        | 0.40  | 2.42E-09 | 0.23  | 5.02E-04 |
| <i>Polr2e</i>        | 0.40  | 2.45E-09 | 0.02  | 7.45E-01 |
| <i>Retn</i>          | 0.40  | 2.58E-09 | 0.23  | 5.19E-04 |
| <i>Fam3c</i>         | -0.40 | 2.62E-09 | -0.08 | 2.15E-01 |
| <i>D10Wsu102e</i>    | -0.40 | 2.62E-09 | -0.36 | 1.52E-08 |
| <i>Rnf6</i>          | -0.40 | 2.64E-09 | 0.09  | 1.84E-01 |
| <i>Ampd2</i>         | -0.40 | 2.67E-09 | -0.01 | 8.49E-01 |
| <i>Eral1</i>         | 0.40  | 2.67E-09 | 0.21  | 1.47E-03 |
| <i>Apbb3</i>         | 0.39  | 2.74E-09 | 0.36  | 1.84E-08 |
| <i>Stat2</i>         | 0.39  | 2.83E-09 | 0.24  | 2.49E-04 |
| <i>Eps15l1</i>       | 0.39  | 2.87E-09 | 0.20  | 1.98E-03 |
| <i>Cpsf1</i>         | 0.39  | 3.20E-09 | 0.16  | 1.65E-02 |
| <i>Tmem186</i>       | 0.39  | 3.33E-09 | 0.28  | 1.67E-05 |
| <i>Dapk1</i>         | 0.39  | 3.34E-09 | 0.14  | 3.05E-02 |
| <i>Tardbp</i>        | 0.39  | 3.41E-09 | 0.31  | 1.89E-06 |
| <i>Ddrgk1</i>        | 0.39  | 3.76E-09 | 0.27  | 4.55E-05 |
| <i>Skil</i>          | -0.39 | 3.80E-09 | -0.10 | 1.20E-01 |
| <i>Rbbp8</i>         | -0.39 | 3.90E-09 | 0.01  | 8.52E-01 |
| <i>Car5b</i>         | 0.39  | 3.92E-09 | 0.28  | 1.65E-05 |
| <i>Fbxw5</i>         | 0.39  | 4.15E-09 | 0.17  | 1.15E-02 |
| <i>Akirin2</i>       | -0.39 | 4.19E-09 | -0.31 | 1.95E-06 |
| <i>Bcr</i>           | 0.39  | 4.25E-09 | 0.31  | 1.83E-06 |
| <i>Clk4</i>          | 0.39  | 4.39E-09 | 0.21  | 1.56E-03 |
| <i>E130309D02Rik</i> | -0.39 | 4.43E-09 | -0.21 | 1.83E-03 |
| <i>Bad</i>           | -0.39 | 4.51E-09 | -0.09 | 1.75E-01 |
| <i>Clpp</i>          | 0.39  | 4.81E-09 | 0.29  | 8.98E-06 |
| <i>Pvrl3</i>         | -0.39 | 4.84E-09 | -0.09 | 1.79E-01 |
| <i>Ccnh</i>          | -0.39 | 4.90E-09 | -0.04 | 5.21E-01 |
| <i>Aplp2</i>         | 0.39  | 4.93E-09 | 0.32  | 1.13E-06 |
| <i>Sh3kbp1</i>       | -0.39 | 4.95E-09 | 0.13  | 4.82E-02 |



|                      |       |          |       |          |
|----------------------|-------|----------|-------|----------|
| <i>Zbtb12</i>        | 0.39  | 5.09E-09 | 0.29  | 1.18E-05 |
| <i>Ptpn21</i>        | 0.39  | 5.37E-09 | 0.38  | 3.08E-09 |
| <i>Bsnd</i>          | 0.39  | 5.43E-09 | 0.26  | 9.68E-05 |
| <i>Pcbp3</i>         | -0.39 | 5.52E-09 | -0.11 | 1.03E-01 |
| <i>Gp1ba</i>         | 0.39  | 5.58E-09 | 0.27  | 4.41E-05 |
| <i>Mettl7a1</i>      | 0.39  | 5.62E-09 | 0.33  | 3.16E-07 |
| <i>Iqgap1</i>        | -0.39 | 5.64E-09 | 0.04  | 5.23E-01 |
| <i>Dnmt1</i>         | -0.39 | 5.88E-09 | -0.15 | 2.05E-02 |
| <i>Zfp369</i>        | 0.39  | 6.06E-09 | 0.33  | 2.22E-07 |
| <i>Vasn</i>          | -0.39 | 6.15E-09 | 0.10  | 1.44E-01 |
| <i>Gna15</i>         | -0.39 | 6.25E-09 | -0.21 | 1.41E-03 |
| <i>Kifc2</i>         | 0.39  | 6.26E-09 | 0.12  | 6.35E-02 |
| <i>Ganc</i>          | 0.39  | 6.32E-09 | 0.29  | 1.10E-05 |
| <i>Dnah11</i>        | -0.39 | 6.36E-09 | 0.01  | 9.00E-01 |
| <i>Brd8</i>          | 0.39  | 6.60E-09 | 0.25  | 1.02E-04 |
| <i>Mfn1</i>          | 0.39  | 6.60E-09 | 0.30  | 5.19E-06 |
| <i>Eml5</i>          | 0.39  | 6.80E-09 | 0.34  | 1.05E-07 |
| <i>Aldh2</i>         | 0.39  | 6.88E-09 | 0.31  | 1.74E-06 |
| <i>Cuedc2</i>        | -0.39 | 6.93E-09 | -0.02 | 7.47E-01 |
| <i>Fxyd1</i>         | 0.39  | 6.96E-09 | 0.25  | 1.59E-04 |
| <i>Tab2</i>          | -0.39 | 6.96E-09 | -0.15 | 2.09E-02 |
| <i>Cops4</i>         | 0.39  | 7.11E-09 | 0.28  | 1.49E-05 |
| <i>Strn3</i>         | -0.39 | 7.28E-09 | -0.08 | 2.57E-01 |
| <i>Mpst</i>          | 0.39  | 7.30E-09 | 0.28  | 1.46E-05 |
| <i>Zfp503</i>        | 0.38  | 7.61E-09 | 0.31  | 2.38E-06 |
| <i>Kpna4</i>         | -0.38 | 7.74E-09 | 0.07  | 3.14E-01 |
| <i>Il12b</i>         | -0.38 | 7.88E-09 | -0.07 | 3.09E-01 |
| <i>Umod</i>          | -0.38 | 8.13E-09 | -0.12 | 8.24E-02 |
| <i>Tmem2</i>         | -0.38 | 8.18E-09 | -0.07 | 3.03E-01 |
| <i>Lamb3</i>         | -0.38 | 8.30E-09 | -0.16 | 1.50E-02 |
| <i>Slain2</i>        | -0.38 | 8.39E-09 | 0.03  | 6.21E-01 |
| <i>Apeh</i>          | 0.38  | 8.43E-09 | 0.16  | 1.38E-02 |
| <i>Cyhr1</i>         | 0.38  | 8.44E-09 | 0.26  | 6.43E-05 |
| <i>Bre</i>           | 0.38  | 8.54E-09 | 0.21  | 1.24E-03 |
| <i>Golga4</i>        | 0.38  | 8.69E-09 | 0.23  | 4.07E-04 |
| <i>Stx17</i>         | 0.38  | 9.12E-09 | 0.29  | 7.56E-06 |
| <i>Hes3</i>          | 0.38  | 9.38E-09 | 0.23  | 5.50E-04 |
| <i>Phf13</i>         | 0.38  | 9.52E-09 | 0.25  | 1.13E-04 |
| <i>Tfpt</i>          | 0.38  | 9.72E-09 | 0.27  | 3.33E-05 |
| <i>Gmfb</i>          | -0.38 | 1.03E-08 | 0.06  | 3.79E-01 |
| <i>Acot12</i>        | 0.38  | 1.04E-08 | 0.18  | 6.86E-03 |
| <i>1810055G02Rik</i> | -0.38 | 1.05E-08 | -0.29 | 9.99E-06 |
| <i>Fbxo45</i>        | 0.38  | 1.07E-08 | 0.21  | 1.74E-03 |
| <i>Rfc5</i>          | -0.38 | 1.08E-08 | -0.34 | 2.17E-07 |
| <i>Ptms</i>          | 0.38  | 1.08E-08 | 0.35  | 4.47E-08 |
| <i>Nupl1</i>         | -0.38 | 1.09E-08 | -0.17 | 9.04E-03 |

|                |       |          |       |          |
|----------------|-------|----------|-------|----------|
| <i>Tcf25</i>   | 0.38  | 1.10E-08 | 0.20  | 2.29E-03 |
| <i>Atp5g1</i>  | 0.38  | 1.15E-08 | 0.17  | 8.27E-03 |
| <i>Bsn</i>     | 0.38  | 1.17E-08 | 0.19  | 3.85E-03 |
| <i>Wnt3a</i>   | 0.38  | 1.24E-08 | 0.28  | 1.27E-05 |
| <i>Pvt1</i>    | 0.38  | 1.27E-08 | 0.03  | 7.06E-01 |
| <i>Osbpl1a</i> | 0.38  | 1.28E-08 | 0.32  | 9.94E-07 |
| <i>Pcmd1</i>   | 0.38  | 1.31E-08 | 0.24  | 2.42E-04 |
| <i>Ros1</i>    | 0.38  | 1.34E-08 | 0.27  | 5.05E-05 |
| <i>Olf1509</i> | 0.38  | 1.41E-08 | 0.28  | 1.55E-05 |
| <i>Acadsb</i>  | 0.38  | 1.44E-08 | 0.25  | 9.94E-05 |
| <i>Adamts5</i> | -0.38 | 1.47E-08 | 0.11  | 1.10E-01 |
| <i>Rock1</i>   | -0.38 | 1.48E-08 | 0.21  | 1.45E-03 |
| <i>Hnrnpdl</i> | 0.38  | 1.54E-08 | 0.13  | 4.79E-02 |
| <i>Zfp518b</i> | -0.38 | 1.55E-08 | 0.09  | 1.59E-01 |
| <i>Cntrob</i>  | 0.38  | 1.57E-08 | 0.20  | 2.42E-03 |
| <i>Ltbp2</i>   | -0.38 | 1.70E-08 | -0.35 | 5.82E-08 |
| <i>Tiam1</i>   | -0.38 | 1.76E-08 | 0.07  | 2.67E-01 |
| <i>Ppp2r5c</i> | -0.38 | 1.77E-08 | 0.14  | 3.56E-02 |
| <i>Adcy6</i>   | 0.38  | 1.81E-08 | 0.29  | 9.33E-06 |
| <i>Taf13</i>   | -0.37 | 1.93E-08 | -0.28 | 1.87E-05 |
| <i>Lamb1</i>   | 0.37  | 1.97E-08 | 0.21  | 1.65E-03 |
| <i>Gpr137b</i> | -0.37 | 1.97E-08 | -0.34 | 1.18E-07 |
| <i>Wdr4</i>    | 0.37  | 2.02E-08 | 0.08  | 2.40E-01 |
| <i>Zbtb18</i>  | -0.37 | 2.03E-08 | -0.18 | 6.46E-03 |
| <i>Huwe1</i>   | 0.37  | 2.07E-08 | 0.19  | 4.64E-03 |
| <i>Anapc5</i>  | 0.37  | 2.09E-08 | 0.28  | 1.29E-05 |
| <i>Prpf4b</i>  | 0.37  | 2.14E-08 | 0.27  | 2.56E-05 |
| <i>Wdr12</i>   | -0.37 | 2.15E-08 | -0.07 | 2.89E-01 |
| 2610524H06Rik  | -0.37 | 2.19E-08 | -0.20 | 2.41E-03 |
| <i>Rps6kb2</i> | 0.37  | 2.26E-08 | 0.19  | 4.03E-03 |
| <i>Gdf3</i>    | -0.37 | 2.33E-08 | -0.23 | 5.40E-04 |
| <i>Pdgfra</i>  | 0.37  | 2.33E-08 | 0.07  | 3.22E-01 |
| <i>Rac3</i>    | -0.37 | 2.36E-08 | -0.11 | 8.37E-02 |
| <i>Fgf13</i>   | -0.37 | 2.38E-08 | -0.21 | 1.55E-03 |
| <i>Rarg</i>    | 0.37  | 2.42E-08 | 0.21  | 1.38E-03 |
| <i>Sbno1</i>   | 0.37  | 2.58E-08 | 0.11  | 9.30E-02 |
| <i>Clint1</i>  | -0.37 | 2.59E-08 | -0.29 | 6.55E-06 |
| <i>Crem</i>    | -0.37 | 2.60E-08 | -0.06 | 3.83E-01 |
| <i>Rhbdd1</i>  | -0.37 | 2.65E-08 | -0.33 | 5.07E-07 |
| <i>Clock</i>   | -0.37 | 2.72E-08 | -0.13 | 4.65E-02 |
| <i>Vamp2</i>   | 0.37  | 2.80E-08 | 0.29  | 9.01E-06 |
| <i>Morf4l2</i> | -0.37 | 2.81E-08 | -0.12 | 6.78E-02 |
| <i>Ddx54</i>   | -0.37 | 2.84E-08 | -0.29 | 1.07E-05 |
| <i>Synj2bp</i> | -0.37 | 2.88E-08 | 0.08  | 2.30E-01 |
| <i>Gna12</i>   | -0.37 | 2.92E-08 | -0.37 | 5.68E-09 |
| <i>Skp2</i>    | -0.37 | 2.92E-08 | -0.04 | 5.08E-01 |

|                 |       |          |       |          |
|-----------------|-------|----------|-------|----------|
| <i>Btbd1</i>    | -0.37 | 3.03E-08 | -0.01 | 8.34E-01 |
| <i>Ctnnb1</i>   | -0.37 | 3.06E-08 | 0.06  | 3.89E-01 |
| <i>Myef2</i>    | -0.37 | 3.10E-08 | -0.21 | 1.42E-03 |
| <i>Slc39a13</i> | -0.37 | 3.15E-08 | -0.20 | 2.07E-03 |
| <i>Dlx1</i>     | 0.37  | 3.19E-08 | 0.14  | 3.94E-02 |
| <i>Oas1b</i>    | 0.37  | 3.23E-08 | 0.23  | 3.75E-04 |
| <i>Arpc4</i>    | -0.37 | 3.26E-08 | -0.24 | 2.35E-04 |
| <i>Csnk2b</i>   | 0.37  | 3.26E-08 | 0.12  | 7.47E-02 |
| <i>Sparc</i>    | -0.37 | 3.27E-08 | -0.11 | 9.46E-02 |
| <i>Lrrfip1</i>  | -0.37 | 3.30E-08 | 0.11  | 8.67E-02 |
| <i>Zfp354c</i>  | 0.37  | 3.42E-08 | 0.29  | 1.07E-05 |
| <i>Usp21</i>    | 0.37  | 3.55E-08 | 0.14  | 3.73E-02 |
| <i>Tbcel</i>    | -0.37 | 3.60E-08 | 0.11  | 1.08E-01 |
| <i>Gnai2</i>    | -0.37 | 3.68E-08 | -0.18 | 7.05E-03 |
| <i>Safb</i>     | 0.37  | 3.72E-08 | 0.22  | 6.67E-04 |
| <i>Tmem147</i>  | 0.37  | 3.80E-08 | 0.13  | 4.66E-02 |
| <i>Fam193b</i>  | 0.37  | 3.85E-08 | 0.23  | 3.81E-04 |
| <i>Rab10</i>    | -0.37 | 3.89E-08 | 0.01  | 8.68E-01 |
| <i>Terf2ip</i>  | 0.37  | 3.93E-08 | 0.33  | 3.86E-07 |
| <i>Tomm7</i>    | 0.37  | 4.04E-08 | 0.31  | 2.20E-06 |
| <i>Psmc11</i>   | 0.37  | 4.23E-08 | 0.04  | 5.62E-01 |
| <i>Sh3gl2</i>   | 0.37  | 4.33E-08 | 0.36  | 2.34E-08 |
| <i>Scarb1</i>   | 0.37  | 4.35E-08 | 0.07  | 3.07E-01 |
| <i>Ndufs7</i>   | 0.37  | 4.41E-08 | 0.24  | 2.59E-04 |
| <i>Wasl</i>     | -0.37 | 4.49E-08 | 0.37  | 1.31E-08 |
| <i>Cog4</i>     | 0.37  | 4.54E-08 | 0.20  | 2.66E-03 |
| <i>Il31ra</i>   | 0.37  | 4.56E-08 | 0.23  | 3.74E-04 |
| <i>Eral1</i>    | 0.37  | 4.59E-08 | 0.15  | 2.36E-02 |
| <i>Fuca2</i>    | -0.37 | 4.76E-08 | 0.14  | 3.49E-02 |
| <i>Ngf</i>      | 0.37  | 4.76E-08 | 0.33  | 3.65E-07 |
| <i>Mapk1</i>    | -0.36 | 4.80E-08 | 0.03  | 6.17E-01 |
| <i>Serf1</i>    | -0.36 | 4.83E-08 | 0.00  | 9.64E-01 |
| <i>Pmm1</i>     | 0.36  | 4.84E-08 | 0.17  | 1.02E-02 |
| <i>Fcgrt</i>    | 0.36  | 4.85E-08 | 0.15  | 1.93E-02 |
| <i>Cdipt</i>    | -0.36 | 4.91E-08 | -0.16 | 1.32E-02 |
| <i>Vma21</i>    | -0.36 | 4.97E-08 | -0.01 | 8.95E-01 |
| <i>Cadm1</i>    | -0.36 | 5.20E-08 | -0.16 | 1.76E-02 |
| <i>Slc30a1</i>  | -0.36 | 5.35E-08 | -0.31 | 1.37E-06 |
| <i>Nras</i>     | -0.36 | 5.45E-08 | -0.21 | 1.52E-03 |
| <i>Nfatc2ip</i> | -0.36 | 5.70E-08 | 0.16  | 1.71E-02 |
| <i>Cyp21a1</i>  | 0.36  | 5.74E-08 | 0.22  | 7.82E-04 |
| <i>Nr2c2ap</i>  | -0.36 | 5.80E-08 | -0.27 | 4.79E-05 |
| <i>Pmm1</i>     | 0.36  | 5.83E-08 | 0.14  | 3.73E-02 |
| <i>Mettl7a2</i> | 0.36  | 5.88E-08 | 0.30  | 3.08E-06 |
| <i>Snap47</i>   | -0.36 | 5.89E-08 | 0.00  | 9.47E-01 |
| <i>S100b</i>    | -0.36 | 6.09E-08 | 0.17  | 8.70E-03 |

|                 |       |          |       |          |
|-----------------|-------|----------|-------|----------|
| <i>Rnf146</i>   | 0.36  | 6.20E-08 | 0.31  | 1.40E-06 |
| <i>Eif2ak2</i>  | 0.36  | 6.25E-08 | 0.30  | 3.41E-06 |
| <i>Cd70</i>     | 0.36  | 6.33E-08 | 0.25  | 1.47E-04 |
| <i>Rusc1</i>    | 0.36  | 6.34E-08 | 0.08  | 2.56E-01 |
| <i>Dguok</i>    | 0.36  | 6.44E-08 | 0.24  | 2.19E-04 |
| <i>Ywhaz</i>    | -0.36 | 6.48E-08 | -0.19 | 3.73E-03 |
| <i>Sf3b4</i>    | -0.36 | 6.49E-08 | -0.34 | 1.67E-07 |
| <i>Lgals12</i>  | 0.36  | 6.69E-08 | 0.28  | 1.24E-05 |
| <i>Zfp768</i>   | 0.36  | 6.84E-08 | 0.31  | 1.58E-06 |
| <i>Igf2os</i>   | 0.36  | 6.84E-08 | 0.31  | 2.68E-06 |
| <i>Hif1a</i>    | -0.36 | 6.86E-08 | 0.16  | 1.40E-02 |
| <i>Agpat3</i>   | 0.36  | 6.95E-08 | 0.22  | 6.34E-04 |
| <i>Kpna3</i>    | -0.36 | 7.19E-08 | -0.24 | 1.87E-04 |
| <i>Polr2l</i>   | 0.36  | 7.26E-08 | 0.22  | 7.40E-04 |
| <i>Cp</i>       | 0.36  | 7.39E-08 | 0.34  | 1.47E-07 |
| <i>Cnot4</i>    | -0.36 | 7.41E-08 | 0.32  | 7.34E-07 |
| <i>Denr</i>     | -0.36 | 7.56E-08 | -0.03 | 6.11E-01 |
| <i>Sart3</i>    | 0.36  | 7.66E-08 | 0.26  | 6.45E-05 |
| <i>Hells</i>    | -0.36 | 7.75E-08 | -0.38 | 2.91E-09 |
| <i>Cdo1</i>     | 0.36  | 7.78E-08 | 0.22  | 8.83E-04 |
| <i>Gpx3</i>     | 0.36  | 7.91E-08 | 0.19  | 3.94E-03 |
| <i>Clk4</i>     | 0.36  | 8.04E-08 | 0.21  | 1.71E-03 |
| <i>Dtnbp1</i>   | 0.36  | 8.20E-08 | 0.05  | 4.73E-01 |
| <i>Hhatl</i>    | 0.36  | 8.21E-08 | 0.32  | 1.00E-06 |
| <i>Rorc</i>     | 0.36  | 8.26E-08 | 0.23  | 6.03E-04 |
| <i>Slc5a9</i>   | 0.36  | 8.45E-08 | 0.44  | 4.10E-12 |
| <i>Galnt3</i>   | -0.36 | 8.48E-08 | 0.12  | 7.31E-02 |
| <i>Ssr1</i>     | -0.36 | 8.61E-08 | -0.04 | 5.05E-01 |
| <i>Spag7</i>    | 0.36  | 8.62E-08 | 0.26  | 6.64E-05 |
| <i>Mut</i>      | 0.36  | 8.69E-08 | 0.25  | 1.01E-04 |
| <i>Pa2g4</i>    | 0.36  | 8.70E-08 | 0.24  | 2.33E-04 |
| <i>Mettl7a1</i> | 0.36  | 8.76E-08 | 0.33  | 4.21E-07 |
| <i>Clec4d</i>   | -0.36 | 8.79E-08 | -0.27 | 3.27E-05 |
| <i>Ufm1</i>     | -0.36 | 8.79E-08 | -0.09 | 1.85E-01 |
| <i>Prl8a9</i>   | 0.36  | 9.01E-08 | 0.19  | 4.48E-03 |
| <i>Klhdc3</i>   | -0.36 | 9.07E-08 | 0.04  | 5.55E-01 |
| <i>Zdhhc2</i>   | -0.36 | 9.10E-08 | -0.02 | 7.70E-01 |
| <i>Odf2</i>     | 0.36  | 9.26E-08 | 0.30  | 4.36E-06 |
| <i>Rnmt</i>     | -0.36 | 9.40E-08 | -0.35 | 4.56E-08 |
| <i>Nek6</i>     | -0.36 | 9.42E-08 | -0.32 | 9.24E-07 |
| <i>Trf</i>      | 0.36  | 9.54E-08 | 0.20  | 2.46E-03 |
| <i>Nbr1</i>     | 0.36  | 9.86E-08 | 0.21  | 1.35E-03 |
| <i>Rab6a</i>    | -0.36 | 1.01E-07 | -0.26 | 5.18E-05 |
| <i>Nacc2</i>    | -0.36 | 1.04E-07 | 0.17  | 1.17E-02 |
| <i>Elmod3</i>   | 0.36  | 1.05E-07 | 0.22  | 9.49E-04 |
| <i>Commd9</i>   | -0.36 | 1.06E-07 | -0.10 | 1.45E-01 |

|                 |       |          |       |          |
|-----------------|-------|----------|-------|----------|
| <i>Stat5b</i>   | 0.36  | 1.06E-07 | -0.01 | 8.26E-01 |
| <i>Rbfox2</i>   | 0.36  | 1.08E-07 | 0.23  | 5.75E-04 |
| <i>Ralgps2</i>  | -0.36 | 1.12E-07 | 0.27  | 4.13E-05 |
| <i>Rcl1</i>     | 0.36  | 1.13E-07 | 0.16  | 1.58E-02 |
| <i>Pbld1</i>    | 0.36  | 1.15E-07 | 0.17  | 1.05E-02 |
| <i>Slc25a44</i> | 0.35  | 1.18E-07 | 0.25  | 1.86E-04 |
| <i>Slc1a3</i>   | 0.35  | 1.19E-07 | 0.25  | 1.43E-04 |
| <i>Neat1</i>    | 0.35  | 1.20E-07 | 0.19  | 4.93E-03 |
| <i>Gusb</i>     | -0.35 | 1.21E-07 | -0.27 | 4.78E-05 |
| <i>Kif17</i>    | 0.35  | 1.23E-07 | 0.30  | 4.37E-06 |
| <i>Sema4f</i>   | 0.35  | 1.24E-07 | 0.23  | 5.81E-04 |
| <i>Ppp1r18</i>  | -0.35 | 1.30E-07 | -0.30 | 4.01E-06 |
| <i>Lama4</i>    | 0.35  | 1.32E-07 | 0.33  | 2.29E-07 |
| <i>Alkbh4</i>   | 0.35  | 1.33E-07 | 0.18  | 6.53E-03 |
| <i>Gid4</i>     | 0.35  | 1.39E-07 | 0.18  | 7.51E-03 |
| <i>Tnfrsf21</i> | -0.35 | 1.40E-07 | -0.19 | 3.17E-03 |
| <i>Olf49</i>    | 0.35  | 1.40E-07 | 0.27  | 3.51E-05 |
| <i>Actn1</i>    | -0.35 | 1.40E-07 | -0.19 | 4.06E-03 |
| <i>Rbm18</i>    | -0.35 | 1.41E-07 | -0.21 | 1.27E-03 |
| 0610012G03Rik   | 0.35  | 1.42E-07 | 0.09  | 1.78E-01 |
| <i>Luc7l</i>    | 0.35  | 1.42E-07 | 0.31  | 1.76E-06 |
| <i>Set</i>      | -0.35 | 1.43E-07 | -0.27 | 3.41E-05 |
| <i>Atf6</i>     | -0.35 | 1.43E-07 | -0.32 | 9.35E-07 |
| <i>Tfpi2</i>    | -0.35 | 1.43E-07 | -0.19 | 4.11E-03 |
| <i>Hp1bp3</i>   | 0.35  | 1.44E-07 | 0.23  | 5.38E-04 |
| 1700123O20Rik   | -0.35 | 1.50E-07 | -0.25 | 1.12E-04 |
| <i>Cadm1</i>    | -0.35 | 1.51E-07 | -0.19 | 4.97E-03 |
| <i>Urm1</i>     | -0.35 | 1.51E-07 | -0.15 | 2.01E-02 |
| <i>Svs5</i>     | 0.35  | 1.55E-07 | 0.22  | 1.04E-03 |
| <i>Ddr1</i>     | -0.35 | 1.56E-07 | 0.10  | 1.53E-01 |
| <i>Hibch</i>    | 0.35  | 1.57E-07 | 0.25  | 1.28E-04 |
| <i>Kpna1</i>    | -0.35 | 1.58E-07 | -0.12 | 7.25E-02 |
| <i>Tspan6</i>   | -0.35 | 1.59E-07 | 0.01  | 8.68E-01 |
| <i>Gtf2a1l</i>  | 0.35  | 1.62E-07 | 0.28  | 1.36E-05 |
| <i>Grb14</i>    | -0.35 | 1.63E-07 | -0.14 | 3.79E-02 |
| <i>Vps72</i>    | 0.35  | 1.63E-07 | 0.19  | 3.30E-03 |
| <i>Sema3a</i>   | 0.35  | 1.64E-07 | 0.33  | 2.25E-07 |
| <i>Pcx</i>      | 0.35  | 1.65E-07 | 0.11  | 9.62E-02 |
| <i>Scaf4</i>    | 0.35  | 1.66E-07 | 0.33  | 4.99E-07 |
| <i>Rcbtb1</i>   | 0.35  | 1.67E-07 | 0.25  | 1.24E-04 |
| <i>Mapre2</i>   | -0.35 | 1.68E-07 | -0.09 | 1.62E-01 |
| <i>Kpna1</i>    | -0.35 | 1.68E-07 | -0.15 | 2.15E-02 |
| <i>Cabp2</i>    | 0.35  | 1.69E-07 | 0.30  | 4.72E-06 |
| <i>Trove2</i>   | 0.35  | 1.70E-07 | 0.16  | 1.77E-02 |
| <i>Cnbd2</i>    | 0.35  | 1.72E-07 | 0.33  | 4.36E-07 |
| <i>Derl1</i>    | 0.35  | 1.75E-07 | 0.21  | 1.21E-03 |

|                 |       |          |       |          |
|-----------------|-------|----------|-------|----------|
| <i>Chek1</i>    | -0.35 | 1.75E-07 | -0.01 | 9.23E-01 |
| <i>Rtn4r</i>    | 0.35  | 1.79E-07 | 0.22  | 7.55E-04 |
| <i>Ubp1</i>     | 0.35  | 1.79E-07 | 0.06  | 4.04E-01 |
| <i>Timm50</i>   | 0.35  | 1.82E-07 | 0.24  | 2.18E-04 |
| <i>Fbxo42</i>   | -0.35 | 1.85E-07 | -0.34 | 1.70E-07 |
| 0610010K14Rik   | 0.35  | 1.90E-07 | 0.13  | 5.28E-02 |
| <i>Mrpl9</i>    | 0.35  | 1.94E-07 | 0.21  | 1.18E-03 |
| <i>Pdcd10</i>   | -0.35 | 1.94E-07 | -0.08 | 2.34E-01 |
| <i>Abcc5</i>    | 0.35  | 1.96E-07 | 0.10  | 1.34E-01 |
| <i>Polrmt</i>   | 0.35  | 1.99E-07 | 0.15  | 1.93E-02 |
| <i>Sp1</i>      | 0.35  | 2.04E-07 | 0.18  | 7.10E-03 |
| <i>Nkx1-2</i>   | 0.35  | 2.05E-07 | 0.30  | 3.09E-06 |
| <i>Bptf</i>     | 0.35  | 2.08E-07 | 0.33  | 3.43E-07 |
| <i>Rps6kc1</i>  | -0.35 | 2.14E-07 | -0.31 | 1.73E-06 |
| <i>Gpr3</i>     | -0.35 | 2.16E-07 | -0.26 | 9.62E-05 |
| <i>Ociad1</i>   | 0.35  | 2.16E-07 | 0.18  | 6.55E-03 |
| <i>Arf6</i>     | -0.35 | 2.18E-07 | -0.26 | 6.46E-05 |
| <i>Cttnal1</i>  | -0.35 | 2.18E-07 | 0.02  | 7.97E-01 |
| <i>Add3</i>     | 0.35  | 2.19E-07 | 0.24  | 3.43E-04 |
| <i>Bub1</i>     | -0.35 | 2.20E-07 | -0.01 | 8.80E-01 |
| <i>Twf2</i>     | -0.35 | 2.20E-07 | -0.28 | 1.54E-05 |
| <i>Rhbdd2</i>   | 0.35  | 2.26E-07 | 0.41  | 1.78E-10 |
| <i>Lrrc16a</i>  | -0.35 | 2.26E-07 | -0.02 | 7.73E-01 |
| 4930549C01Rik   | 0.35  | 2.30E-07 | 0.31  | 1.49E-06 |
| <i>Prdm1</i>    | -0.35 | 2.37E-07 | -0.35 | 5.02E-08 |
| <i>Ankib1</i>   | -0.35 | 2.39E-07 | -0.13 | 4.83E-02 |
| <i>Pam</i>      | -0.35 | 2.42E-07 | -0.20 | 3.08E-03 |
| <i>Xbp1</i>     | 0.35  | 2.44E-07 | 0.16  | 1.31E-02 |
| <i>Mrps26</i>   | 0.35  | 2.46E-07 | 0.15  | 2.05E-02 |
| <i>Ii21r</i>    | 0.35  | 2.48E-07 | 0.28  | 2.11E-05 |
| <i>Scarb1</i>   | 0.35  | 2.50E-07 | 0.05  | 4.83E-01 |
| <i>Ndst3</i>    | 0.35  | 2.51E-07 | 0.15  | 2.08E-02 |
| <i>Gdap1</i>    | 0.35  | 2.54E-07 | 0.25  | 1.27E-04 |
| <i>Tecr</i>     | 0.35  | 2.55E-07 | 0.20  | 2.09E-03 |
| <i>Rhoc</i>     | -0.35 | 2.58E-07 | -0.18 | 5.35E-03 |
| <i>Slc25a39</i> | 0.35  | 2.61E-07 | 0.12  | 6.82E-02 |
| <i>Car6</i>     | -0.35 | 2.62E-07 | -0.20 | 1.91E-03 |
| <i>Fgf13</i>    | -0.35 | 2.65E-07 | -0.22 | 7.06E-04 |
| <i>Safb</i>     | 0.35  | 2.68E-07 | 0.21  | 1.52E-03 |
| <i>Zcchc14</i>  | 0.35  | 2.72E-07 | 0.41  | 1.08E-10 |
| <i>Slc39a1</i>  | -0.34 | 2.75E-07 | -0.29 | 9.54E-06 |
| <i>Ptms</i>     | 0.34  | 2.77E-07 | 0.32  | 9.72E-07 |
| <i>Mlf2</i>     | 0.34  | 2.77E-07 | 0.19  | 4.93E-03 |
| <i>Asb6</i>     | -0.34 | 2.81E-07 | -0.41 | 8.55E-11 |
| <i>Ccdc96</i>   | 0.34  | 2.88E-07 | 0.38  | 3.34E-09 |
| <i>Oma1</i>     | 0.34  | 2.89E-07 | 0.11  | 9.63E-02 |

|                 |       |          |       |          |
|-----------------|-------|----------|-------|----------|
| <i>Ptpn12</i>   | -0.34 | 2.89E-07 | -0.27 | 2.55E-05 |
| <i>E4f1</i>     | 0.34  | 2.90E-07 | 0.23  | 5.25E-04 |
| <i>Clec3b</i>   | 0.34  | 2.90E-07 | 0.18  | 6.08E-03 |
| <i>Pbx3</i>     | -0.34 | 2.95E-07 | -0.25 | 1.24E-04 |
| <i>Gins1</i>    | -0.34 | 2.98E-07 | -0.32 | 5.46E-07 |
| <i>Ripk1</i>    | -0.34 | 3.01E-07 | -0.08 | 2.23E-01 |
| <i>Zfp52</i>    | -0.34 | 3.08E-07 | -0.22 | 1.01E-03 |
| <i>Birc6</i>    | -0.34 | 3.08E-07 | 0.21  | 1.28E-03 |
| <i>Tmem134</i>  | 0.34  | 3.09E-07 | 0.20  | 2.41E-03 |
| <i>Bmpr1a</i>   | -0.34 | 3.09E-07 | 0.04  | 5.43E-01 |
| <i>Ankef1</i>   | 0.34  | 3.10E-07 | 0.36  | 3.10E-08 |
| <i>Nfe2l2</i>   | -0.34 | 3.10E-07 | -0.30 | 4.10E-06 |
| <i>Nudcd2</i>   | -0.34 | 3.10E-07 | -0.17 | 8.59E-03 |
| <i>Topors</i>   | 0.34  | 3.11E-07 | 0.21  | 1.42E-03 |
| <i>Zfyve21</i>  | 0.34  | 3.11E-07 | 0.28  | 1.59E-05 |
| <i>Ddx39b</i>   | 0.34  | 3.14E-07 | 0.22  | 1.06E-03 |
| <i>Wrnip1</i>   | 0.34  | 3.14E-07 | 0.30  | 4.71E-06 |
| <i>Klhl42</i>   | -0.34 | 3.18E-07 | -0.11 | 9.02E-02 |
| <i>Tpst1</i>    | 0.34  | 3.19E-07 | 0.17  | 1.11E-02 |
| <i>Tyr</i>      | 0.34  | 3.21E-07 | 0.28  | 2.09E-05 |
| <i>BC024139</i> | 0.34  | 3.22E-07 | 0.15  | 2.07E-02 |
| <i>Mark1</i>    | -0.34 | 3.33E-07 | 0.02  | 7.47E-01 |
| <i>Orc3</i>     | 0.34  | 3.38E-07 | 0.24  | 2.65E-04 |
| <i>Hsd17b1</i>  | 0.34  | 3.38E-07 | 0.29  | 6.60E-06 |
| <i>Trpt1</i>    | 0.34  | 3.38E-07 | 0.20  | 2.94E-03 |
| <i>Lrp1b</i>    | 0.34  | 3.41E-07 | 0.18  | 6.08E-03 |
| <i>Mif</i>      | 0.34  | 3.43E-07 | 0.11  | 8.64E-02 |
| <i>Hibch</i>    | 0.34  | 3.43E-07 | 0.23  | 3.47E-04 |
| <i>Olah</i>     | -0.34 | 3.46E-07 | 0.16  | 1.70E-02 |
| <i>Cfd</i>      | 0.34  | 3.47E-07 | 0.26  | 5.29E-05 |
| <i>Gdap1</i>    | -0.34 | 3.49E-07 | -0.13 | 4.41E-02 |
| <i>Hoxd4</i>    | 0.34  | 3.50E-07 | 0.26  | 9.01E-05 |
| <i>Tubb3</i>    | -0.34 | 3.55E-07 | -0.18 | 5.75E-03 |
| <i>Ptprs</i>    | -0.34 | 3.57E-07 | -0.13 | 5.18E-02 |
| <i>Srek1</i>    | 0.34  | 3.60E-07 | 0.27  | 2.84E-05 |
| <i>Brox</i>     | 0.34  | 3.62E-07 | 0.14  | 3.34E-02 |
| <i>Hnrnp3</i>   | 0.34  | 3.63E-07 | 0.30  | 3.53E-06 |
| <i>Zswim1</i>   | -0.34 | 3.66E-07 | -0.24 | 2.25E-04 |
| <i>Smim11</i>   | 0.34  | 3.67E-07 | 0.26  | 5.37E-05 |
| <i>Amn</i>      | -0.34 | 3.71E-07 | -0.19 | 4.92E-03 |
| <i>Orc4</i>     | -0.34 | 3.79E-07 | 0.22  | 6.94E-04 |
| <i>AI462493</i> | 0.34  | 3.81E-07 | 0.26  | 5.66E-05 |
| <i>Fam129b</i>  | -0.34 | 3.84E-07 | -0.24 | 3.44E-04 |
| <i>Pter</i>     | -0.34 | 3.84E-07 | 0.03  | 6.75E-01 |
| <i>Cd247</i>    | 0.34  | 3.88E-07 | 0.19  | 4.33E-03 |
| <i>Psm4</i>     | 0.34  | 3.91E-07 | 0.19  | 3.93E-03 |

|                  |       |          |       |          |
|------------------|-------|----------|-------|----------|
| <i>Agl</i>       | 0.34  | 3.94E-07 | 0.00  | 9.91E-01 |
| <i>Cnot8</i>     | 0.34  | 3.97E-07 | 0.16  | 1.27E-02 |
| <i>Sparc</i>     | -0.34 | 3.97E-07 | -0.18 | 7.34E-03 |
| <i>Frat1</i>     | 0.34  | 3.98E-07 | 0.15  | 2.15E-02 |
| <i>Ccnl2</i>     | 0.34  | 3.98E-07 | 0.27  | 3.12E-05 |
| <i>Rabgef1</i>   | -0.34 | 4.01E-07 | 0.04  | 5.11E-01 |
| <i>Mtmr10</i>    | -0.34 | 4.04E-07 | -0.28 | 1.46E-05 |
| <i>Cnot3</i>     | 0.34  | 4.06E-07 | 0.14  | 3.54E-02 |
| <i>Dpp3</i>      | -0.34 | 4.07E-07 | -0.30 | 5.23E-06 |
| <i>Mbd6</i>      | 0.34  | 4.07E-07 | 0.16  | 1.41E-02 |
| <i>Farp2</i>     | 0.34  | 4.09E-07 | 0.11  | 9.20E-02 |
| <i>Alpk2</i>     | -0.34 | 4.09E-07 | -0.16 | 1.63E-02 |
| <i>Ighmbp2</i>   | 0.34  | 4.10E-07 | 0.25  | 1.25E-04 |
| <i>Dock8</i>     | -0.34 | 4.22E-07 | 0.07  | 3.23E-01 |
| <i>Bre</i>       | 0.34  | 4.28E-07 | 0.17  | 1.02E-02 |
| <i>Pcdhb8</i>    | 0.34  | 4.29E-07 | 0.35  | 8.82E-08 |
| <i>Amfr</i>      | 0.34  | 4.33E-07 | 0.20  | 2.83E-03 |
| <i>Dopey2</i>    | -0.34 | 4.33E-07 | 0.18  | 6.21E-03 |
| <i>Mlxipl</i>    | 0.34  | 4.39E-07 | 0.22  | 6.99E-04 |
| <i>Bub3</i>      | -0.34 | 4.45E-07 | -0.12 | 6.10E-02 |
| <i>Dgkg</i>      | 0.34  | 4.46E-07 | 0.35  | 4.83E-08 |
| <i>Sqrdl</i>     | 0.34  | 4.55E-07 | 0.26  | 7.60E-05 |
| <i>Slc35f6</i>   | -0.34 | 4.59E-07 | -0.32 | 9.89E-07 |
| <i>Hsd17b10</i>  | 0.34  | 4.69E-07 | 0.29  | 7.90E-06 |
| <i>Ccnl2</i>     | 0.34  | 4.69E-07 | 0.25  | 1.08E-04 |
| <i>Nsfl1c</i>    | 0.34  | 4.74E-07 | 0.22  | 7.76E-04 |
| <i>Pi15</i>      | 0.34  | 4.75E-07 | 0.20  | 2.11E-03 |
| <i>Trp53inp2</i> | -0.34 | 4.75E-07 | -0.17 | 8.84E-03 |
| <i>Uba7</i>      | 0.34  | 4.76E-07 | 0.18  | 6.21E-03 |
| <i>Taf4a</i>     | 0.34  | 4.77E-07 | 0.12  | 7.52E-02 |
| <i>Fam83g</i>    | 0.34  | 4.84E-07 | 0.17  | 9.12E-03 |
| <i>Ppil2</i>     | 0.34  | 4.85E-07 | 0.10  | 1.26E-01 |
| <i>Ankrd24</i>   | 0.34  | 4.89E-07 | 0.22  | 1.03E-03 |
| <i>Il2</i>       | 0.34  | 4.99E-07 | 0.16  | 1.85E-02 |
| <i>Ndufa6</i>    | 0.34  | 5.02E-07 | 0.28  | 1.87E-05 |
| <i>Npr3</i>      | -0.34 | 5.03E-07 | 0.25  | 1.08E-04 |
| <i>Txn2</i>      | 0.34  | 5.09E-07 | 0.26  | 7.84E-05 |
| <i>Cebpa</i>     | 0.34  | 5.11E-07 | 0.25  | 1.81E-04 |
| <i>Hils1</i>     | 0.34  | 5.13E-07 | 0.15  | 2.65E-02 |
| <i>Hsd17b10</i>  | 0.34  | 5.14E-07 | 0.26  | 6.69E-05 |
| <i>Plekhh1</i>   | 0.34  | 5.20E-07 | 0.33  | 2.97E-07 |
| <i>Phf2</i>      | 0.34  | 5.25E-07 | 0.29  | 1.20E-05 |
| <i>Terf2</i>     | 0.34  | 5.26E-07 | 0.31  | 2.20E-06 |
| <i>Rrp9</i>      | -0.34 | 5.26E-07 | -0.40 | 5.16E-10 |
| <i>Znrf1</i>     | 0.34  | 5.27E-07 | 0.20  | 2.44E-03 |
| <i>Cdon</i>      | 0.34  | 5.28E-07 | 0.28  | 1.75E-05 |



|                   |       |          |       |          |
|-------------------|-------|----------|-------|----------|
| <i>Mos</i>        | 0.34  | 5.28E-07 | 0.31  | 1.24E-06 |
| <i>Rell1</i>      | -0.34 | 5.29E-07 | -0.25 | 1.57E-04 |
| <i>Ppp1r1a</i>    | 0.34  | 5.30E-07 | 0.17  | 1.15E-02 |
| <i>Ttc28</i>      | -0.34 | 5.32E-07 | 0.02  | 7.19E-01 |
| <i>Morc1</i>      | -0.34 | 5.33E-07 | -0.13 | 4.46E-02 |
| <i>Insig2</i>     | 0.34  | 5.37E-07 | 0.24  | 2.03E-04 |
| <i>Vti1b</i>      | 0.34  | 5.41E-07 | 0.23  | 3.68E-04 |
| <i>Prkar2a</i>    | -0.34 | 5.41E-07 | -0.22 | 7.16E-04 |
| <i>Rtkn2</i>      | 0.34  | 5.44E-07 | 0.24  | 3.27E-04 |
| <i>Pex5</i>       | 0.34  | 5.44E-07 | 0.16  | 1.78E-02 |
| <i>Prkcg</i>      | 0.34  | 5.47E-07 | 0.26  | 5.79E-05 |
| <i>Prps2</i>      | -0.34 | 5.52E-07 | -0.06 | 3.94E-01 |
| <i>Ankrd6</i>     | 0.34  | 5.57E-07 | 0.29  | 1.00E-05 |
| <i>Olr1</i>       | -0.34 | 5.59E-07 | -0.28 | 1.94E-05 |
| <i>Kcnn4</i>      | -0.34 | 5.60E-07 | -0.26 | 8.08E-05 |
| <i>Msantd4</i>    | -0.34 | 5.61E-07 | -0.31 | 1.73E-06 |
| <i>Ginm1</i>      | 0.34  | 5.64E-07 | 0.28  | 2.46E-05 |
| <i>Srp14</i>      | -0.34 | 5.65E-07 | -0.19 | 4.23E-03 |
| <i>Xdh</i>        | 0.34  | 5.74E-07 | 0.25  | 1.75E-04 |
| <i>Ykt6</i>       | -0.34 | 5.77E-07 | 0.02  | 7.11E-01 |
| <i>Lsm10</i>      | 0.34  | 5.83E-07 | 0.15  | 2.63E-02 |
| <i>Rbms2</i>      | 0.34  | 5.84E-07 | 0.20  | 1.87E-03 |
| <i>Prss39</i>     | 0.34  | 5.85E-07 | 0.30  | 4.09E-06 |
| <i>Fam102a</i>    | -0.34 | 5.91E-07 | 0.05  | 4.97E-01 |
| <i>Kctd5</i>      | -0.34 | 6.04E-07 | -0.22 | 8.35E-04 |
| <i>Cenpq</i>      | -0.34 | 6.05E-07 | -0.35 | 5.73E-08 |
| <i>Ercc6l</i>     | -0.34 | 6.12E-07 | -0.31 | 1.84E-06 |
| <i>Tcerg1</i>     | -0.34 | 6.20E-07 | 0.13  | 4.77E-02 |
| <i>St6galnac5</i> | 0.34  | 6.27E-07 | 0.27  | 2.85E-05 |
| <i>Uqcr10</i>     | 0.34  | 6.28E-07 | 0.31  | 1.26E-06 |
| <i>Snrpe</i>      | -0.33 | 6.34E-07 | -0.30 | 2.74E-06 |
| <i>Lbh</i>        | -0.33 | 6.35E-07 | 0.11  | 9.53E-02 |
| <i>Uba5</i>       | -0.33 | 6.35E-07 | -0.07 | 3.19E-01 |
| <i>Mfap1a</i>     | 0.33  | 6.40E-07 | 0.21  | 1.16E-03 |
| <i>Pex5</i>       | 0.33  | 6.48E-07 | 0.13  | 4.69E-02 |
| <i>Tpd52</i>      | -0.33 | 6.49E-07 | -0.22 | 1.06E-03 |
| <i>Dlgap5</i>     | -0.33 | 6.52E-07 | -0.35 | 7.33E-08 |
| <i>Mib2</i>       | 0.33  | 6.60E-07 | 0.25  | 1.25E-04 |
| <i>Pde3a</i>      | 0.33  | 6.79E-07 | 0.22  | 9.80E-04 |
| <i>Leng8</i>      | 0.33  | 6.85E-07 | 0.12  | 6.67E-02 |
| <i>Dck</i>        | -0.33 | 6.85E-07 | 0.03  | 6.12E-01 |
| <i>Mphosph8</i>   | -0.33 | 7.01E-07 | -0.08 | 2.19E-01 |
| <i>Kmt2e</i>      | 0.33  | 7.02E-07 | 0.27  | 2.74E-05 |
| <i>Tmod3</i>      | -0.33 | 7.13E-07 | 0.14  | 3.02E-02 |
| <i>Scarb1</i>     | 0.33  | 7.14E-07 | 0.03  | 6.82E-01 |
| <i>Tank</i>       | -0.33 | 7.16E-07 | -0.29 | 9.64E-06 |

|                  |       |          |       |          |
|------------------|-------|----------|-------|----------|
| <i>Asprv1</i>    | 0.33  | 7.20E-07 | 0.34  | 2.01E-07 |
| <i>Iqsec1</i>    | -0.33 | 7.26E-07 | 0.10  | 1.24E-01 |
| <i>Adra2c</i>    | 0.33  | 7.38E-07 | 0.26  | 5.73E-05 |
| <i>Bmpr1a</i>    | -0.33 | 7.38E-07 | -0.04 | 5.67E-01 |
| <i>Spta1</i>     | -0.33 | 7.43E-07 | -0.04 | 5.62E-01 |
| <i>Pnpla2</i>    | 0.33  | 7.48E-07 | 0.20  | 1.88E-03 |
| <i>Nr1h4</i>     | 0.33  | 7.50E-07 | 0.18  | 7.39E-03 |
| <i>Map1lc3b</i>  | 0.33  | 7.51E-07 | 0.18  | 7.77E-03 |
| <i>Ddx42</i>     | 0.33  | 7.63E-07 | 0.21  | 1.61E-03 |
| <i>Ccne2</i>     | -0.33 | 7.70E-07 | -0.32 | 7.22E-07 |
| <i>Zdhhc14</i>   | -0.33 | 7.70E-07 | -0.27 | 2.68E-05 |
| <i>Junb</i>      | -0.33 | 7.76E-07 | -0.23 | 3.71E-04 |
| <i>Id1</i>       | 0.33  | 7.78E-07 | 0.33  | 3.19E-07 |
| <i>Itpk1</i>     | -0.33 | 7.82E-07 | -0.17 | 9.15E-03 |
| <i>Apba3</i>     | 0.33  | 7.90E-07 | 0.11  | 8.95E-02 |
| <i>Opn3</i>      | 0.33  | 7.90E-07 | 0.20  | 2.85E-03 |
| <i>Creb3</i>     | -0.33 | 7.96E-07 | -0.22 | 7.99E-04 |
| <i>Lmf1</i>      | 0.33  | 8.00E-07 | 0.19  | 4.36E-03 |
| <i>Tpx2</i>      | -0.33 | 8.13E-07 | -0.07 | 2.62E-01 |
| <i>Birc3</i>     | -0.33 | 8.22E-07 | -0.26 | 6.04E-05 |
| <i>Casr</i>      | 0.33  | 8.28E-07 | 0.19  | 5.05E-03 |
| <i>Gabarapl1</i> | 0.33  | 8.33E-07 | 0.14  | 3.76E-02 |
| <i>Srrm1</i>     | 0.33  | 8.36E-07 | 0.38  | 2.10E-09 |
| <i>Ceacam12</i>  | 0.33  | 8.36E-07 | 0.19  | 3.78E-03 |
| <i>Mbd2</i>      | 0.33  | 8.37E-07 | 0.23  | 3.60E-04 |
| <i>Kcna1</i>     | 0.33  | 8.39E-07 | 0.26  | 8.84E-05 |
| <i>Acin1</i>     | 0.33  | 8.44E-07 | 0.32  | 1.15E-06 |
| <i>Poldip3</i>   | -0.33 | 8.47E-07 | -0.17 | 8.14E-03 |
| <i>Stoml2</i>    | 0.33  | 8.47E-07 | 0.27  | 2.69E-05 |
| <i>Smdt1</i>     | 0.33  | 8.49E-07 | 0.04  | 5.97E-01 |
| <i>Trip12</i>    | -0.33 | 8.52E-07 | 0.17  | 9.51E-03 |
| <i>Col18a1</i>   | -0.33 | 8.52E-07 | 0.08  | 2.24E-01 |
| <i>Hrh1</i>      | 0.33  | 8.56E-07 | 0.09  | 1.73E-01 |
| <i>Capza1</i>    | -0.33 | 8.61E-07 | -0.30 | 3.45E-06 |
| <i>Mtpn</i>      | -0.33 | 8.64E-07 | 0.04  | 5.62E-01 |
| <i>Pxk</i>       | 0.33  | 8.67E-07 | 0.10  | 1.35E-01 |
| <i>Nlk</i>       | -0.33 | 8.67E-07 | -0.08 | 2.53E-01 |
| <i>Sra1</i>      | 0.33  | 8.80E-07 | 0.24  | 2.20E-04 |
| <i>Sema4a</i>    | 0.33  | 8.91E-07 | 0.25  | 1.26E-04 |
| <i>Cog1</i>      | 0.33  | 8.99E-07 | 0.05  | 4.51E-01 |
| <i>Eri3</i>      | 0.33  | 9.02E-07 | 0.15  | 2.21E-02 |
| <i>Nras</i>      | -0.33 | 9.17E-07 | -0.32 | 1.02E-06 |
| <i>Six4</i>      | 0.33  | 9.17E-07 | 0.20  | 2.48E-03 |
| <i>Aip</i>       | 0.33  | 9.33E-07 | 0.08  | 2.12E-01 |
| <i>Spon1</i>     | 0.33  | 9.36E-07 | 0.21  | 1.59E-03 |
| <i>Nudt6</i>     | 0.33  | 9.48E-07 | 0.17  | 1.13E-02 |

|                 |       |          |       |          |
|-----------------|-------|----------|-------|----------|
| <i>Cdkn1c</i>   | 0.33  | 9.61E-07 | 0.24  | 3.17E-04 |
| <i>Bsg</i>      | 0.33  | 9.62E-07 | 0.31  | 1.63E-06 |
| <i>Wnt7b</i>    | -0.33 | 9.64E-07 | -0.09 | 1.62E-01 |
| <i>Ndufs3</i>   | 0.33  | 9.78E-07 | 0.31  | 2.14E-06 |
| <i>Fam210b</i>  | 0.33  | 9.88E-07 | 0.34  | 1.04E-07 |
| <i>Rock1</i>    | -0.33 | 1.00E-06 | 0.04  | 5.51E-01 |
| <i>Tmem185b</i> | -0.33 | 1.01E-06 | -0.33 | 3.45E-07 |
| <i>Pcdh10</i>   | 0.33  | 1.01E-06 | 0.16  | 1.79E-02 |
| <i>Eftud2</i>   | -0.33 | 1.01E-06 | -0.05 | 4.73E-01 |
| <i>Mlst8</i>    | -0.33 | 1.02E-06 | -0.03 | 6.40E-01 |
| <i>Sp4</i>      | 0.33  | 1.03E-06 | 0.25  | 1.36E-04 |
| <i>Hmces</i>    | 0.33  | 1.05E-06 | 0.30  | 4.10E-06 |
| <i>Fscn1</i>    | -0.33 | 1.06E-06 | 0.22  | 8.83E-04 |
| <i>Strn3</i>    | -0.33 | 1.06E-06 | -0.12 | 7.43E-02 |
| <i>Prmt6</i>    | -0.33 | 1.07E-06 | -0.34 | 1.08E-07 |
| <i>Poldip3</i>  | -0.33 | 1.07E-06 | -0.29 | 1.05E-05 |
| <i>Trpm7</i>    | 0.33  | 1.08E-06 | 0.20  | 2.87E-03 |
| <i>Six4</i>     | 0.33  | 1.08E-06 | 0.13  | 4.20E-02 |
| <i>Uggt2</i>    | 0.33  | 1.09E-06 | 0.17  | 1.19E-02 |
| <i>Rasa3</i>    | 0.33  | 1.09E-06 | 0.10  | 1.27E-01 |
| <i>Crebzf</i>   | 0.33  | 1.09E-06 | 0.08  | 2.34E-01 |
| <i>Unc119b</i>  | 0.33  | 1.10E-06 | 0.25  | 1.65E-04 |
| <i>Syne1</i>    | 0.33  | 1.12E-06 | 0.24  | 2.98E-04 |
| <i>Syne1</i>    | 0.33  | 1.12E-06 | 0.24  | 2.98E-04 |
| <i>Taldo1</i>   | 0.33  | 1.12E-06 | 0.16  | 1.85E-02 |
| <i>Evi5</i>     | 0.33  | 1.13E-06 | 0.28  | 2.11E-05 |
| <i>Fabp4</i>    | 0.33  | 1.13E-06 | 0.16  | 1.37E-02 |
| <i>Yipf5</i>    | -0.33 | 1.13E-06 | -0.27 | 2.67E-05 |
| <i>Lrrc18</i>   | 0.33  | 1.15E-06 | 0.30  | 4.76E-06 |
| <i>Ncor1</i>    | 0.33  | 1.16E-06 | 0.23  | 3.75E-04 |
| <i>Nono</i>     | -0.33 | 1.16E-06 | -0.21 | 1.15E-03 |
| <i>Glrb</i>     | -0.33 | 1.17E-06 | -0.16 | 1.76E-02 |
| <i>Thap7</i>    | -0.33 | 1.18E-06 | -0.11 | 1.07E-01 |
| <i>Prkag2</i>   | 0.33  | 1.19E-06 | 0.19  | 3.50E-03 |
| <i>Api5</i>     | -0.33 | 1.20E-06 | -0.11 | 1.07E-01 |
| <i>Ell</i>      | 0.33  | 1.20E-06 | -0.05 | 4.10E-01 |
| <i>Dusp9</i>    | -0.33 | 1.21E-06 | -0.19 | 3.70E-03 |
| <i>Cox8a</i>    | 0.33  | 1.23E-06 | 0.25  | 1.07E-04 |
| <i>Mapk14</i>   | 0.33  | 1.24E-06 | -0.07 | 2.74E-01 |
| <i>Slc25a4</i>  | 0.33  | 1.25E-06 | 0.36  | 2.89E-08 |
| <i>Por</i>      | 0.33  | 1.25E-06 | 0.20  | 1.88E-03 |
| <i>Ccdc101</i>  | 0.33  | 1.25E-06 | 0.23  | 4.18E-04 |
| <i>Stam2</i>    | -0.33 | 1.27E-06 | -0.03 | 6.88E-01 |
| <i>Rab18</i>    | 0.33  | 1.28E-06 | 0.20  | 2.08E-03 |
| <i>Abhd5</i>    | 0.33  | 1.28E-06 | 0.10  | 1.15E-01 |
| <i>Calm1</i>    | -0.33 | 1.29E-06 | -0.15 | 2.82E-02 |

|                      |       |          |       |          |
|----------------------|-------|----------|-------|----------|
| <i>Mtch2</i>         | 0.33  | 1.30E-06 | 0.24  | 2.39E-04 |
| <i>Rae1</i>          | 0.33  | 1.31E-06 | 0.18  | 5.14E-03 |
| <i>Ache</i>          | 0.33  | 1.32E-06 | 0.21  | 1.36E-03 |
| <i>Spata6</i>        | -0.33 | 1.32E-06 | 0.04  | 5.52E-01 |
| <i>Figl1</i>         | -0.33 | 1.34E-06 | -0.30 | 4.97E-06 |
| <i>Vmn1r58</i>       | 0.33  | 1.35E-06 | 0.28  | 1.95E-05 |
| <i>Rad50</i>         | -0.33 | 1.35E-06 | -0.04 | 5.67E-01 |
| <i>Parp2</i>         | 0.33  | 1.35E-06 | -0.04 | 5.23E-01 |
| <i>Tsku</i>          | -0.33 | 1.35E-06 | -0.38 | 2.99E-09 |
| <i>Skil</i>          | -0.33 | 1.37E-06 | -0.24 | 2.50E-04 |
| <i>Canx</i>          | -0.33 | 1.38E-06 | -0.20 | 2.14E-03 |
| <i>Isl1</i>          | 0.33  | 1.39E-06 | 0.15  | 2.12E-02 |
| <i>Apc</i>           | -0.33 | 1.39E-06 | 0.26  | 6.74E-05 |
| <i>Tle4</i>          | -0.32 | 1.41E-06 | -0.22 | 9.16E-04 |
| <i>Slc2a3</i>        | 0.32  | 1.41E-06 | 0.19  | 3.76E-03 |
| <i>S100a3</i>        | -0.32 | 1.41E-06 | -0.21 | 1.46E-03 |
| <i>Dsc2</i>          | -0.32 | 1.41E-06 | 0.01  | 8.65E-01 |
| <i>Polr3g</i>        | -0.32 | 1.41E-06 | -0.27 | 3.09E-05 |
| <i>Pkhd1</i>         | -0.32 | 1.42E-06 | -0.05 | 4.54E-01 |
| <i>Polr1c</i>        | 0.32  | 1.42E-06 | 0.11  | 8.64E-02 |
| <i>Ube4b</i>         | 0.32  | 1.42E-06 | 0.13  | 4.77E-02 |
| <i>Ces4a</i>         | 0.32  | 1.43E-06 | 0.21  | 1.46E-03 |
| <i>Vav3</i>          | -0.32 | 1.44E-06 | -0.22 | 9.38E-04 |
| <i>Rbbp6</i>         | 0.32  | 1.44E-06 | 0.29  | 9.83E-06 |
| <i>Srgap1</i>        | 0.32  | 1.45E-06 | 0.23  | 3.91E-04 |
| <i>Fut4</i>          | 0.32  | 1.46E-06 | 0.30  | 5.52E-06 |
| <i>Cggbp1</i>        | -0.32 | 1.47E-06 | -0.18 | 6.63E-03 |
| <i>Zfp574</i>        | 0.32  | 1.48E-06 | 0.26  | 7.37E-05 |
| <i>S100a8</i>        | -0.32 | 1.48E-06 | -0.22 | 7.12E-04 |
| <i>Grhpr</i>         | 0.32  | 1.49E-06 | 0.29  | 1.10E-05 |
| <i>Lifr</i>          | -0.32 | 1.49E-06 | 0.12  | 7.90E-02 |
| <i>Iqgap1</i>        | -0.32 | 1.51E-06 | -0.18 | 5.12E-03 |
| <i>Uck2</i>          | 0.32  | 1.51E-06 | 0.22  | 6.23E-04 |
| <i>Uck2</i>          | 0.32  | 1.51E-06 | 0.22  | 6.23E-04 |
| <i>Minpp1</i>        | -0.32 | 1.52E-06 | -0.27 | 4.27E-05 |
| <i>D4Wsu53e</i>      | 0.32  | 1.52E-06 | 0.13  | 5.00E-02 |
| <i>Endou</i>         | -0.32 | 1.52E-06 | 0.07  | 3.23E-01 |
| <i>Sp5</i>           | 0.32  | 1.52E-06 | 0.28  | 1.61E-05 |
| <i>Zadh2</i>         | 0.32  | 1.52E-06 | 0.23  | 5.19E-04 |
| <i>Palld</i>         | -0.32 | 1.53E-06 | -0.21 | 1.51E-03 |
| <i>Zfp418</i>        | -0.32 | 1.53E-06 | -0.19 | 4.78E-03 |
| <i>Hspa2</i>         | -0.32 | 1.53E-06 | 0.21  | 1.15E-03 |
| <i>Rad51b</i>        | 0.32  | 1.54E-06 | 0.16  | 1.30E-02 |
| <i>Zfp92</i>         | 0.32  | 1.54E-06 | 0.33  | 2.72E-07 |
| <i>4921530L21Rik</i> | -0.32 | 1.58E-06 | -0.19 | 4.18E-03 |
| <i>Cadm1</i>         | -0.32 | 1.58E-06 | -0.19 | 4.58E-03 |

|                 |       |          |       |          |
|-----------------|-------|----------|-------|----------|
| <i>Brat1</i>    | 0.32  | 1.59E-06 | 0.32  | 7.78E-07 |
| <i>Pex6</i>     | 0.32  | 1.63E-06 | 0.16  | 1.31E-02 |
| <i>Pfdn5</i>    | 0.32  | 1.63E-06 | 0.24  | 2.38E-04 |
| <i>Etv1</i>     | -0.32 | 1.64E-06 | -0.11 | 8.49E-02 |
| <i>Prkg2</i>    | 0.32  | 1.64E-06 | 0.36  | 1.66E-08 |
| <i>Cav1</i>     | -0.32 | 1.64E-06 | 0.02  | 7.61E-01 |
| <i>Dgat1</i>    | 0.32  | 1.69E-06 | 0.08  | 2.05E-01 |
| <i>Fbxl15</i>   | -0.32 | 1.70E-06 | -0.12 | 6.00E-02 |
| <i>Il1rapl2</i> | -0.32 | 1.70E-06 | 0.10  | 1.21E-01 |
| <i>Zfp148</i>   | -0.32 | 1.70E-06 | 0.25  | 1.55E-04 |
| <i>Ccr7</i>     | -0.32 | 1.71E-06 | -0.22 | 7.49E-04 |
| <i>Bace1</i>    | -0.32 | 1.71E-06 | -0.09 | 1.99E-01 |
| <i>Sec63</i>    | -0.32 | 1.72E-06 | 0.18  | 5.47E-03 |
| <i>Dnajc12</i>  | -0.32 | 1.72E-06 | -0.23 | 5.39E-04 |
| <i>Aktip</i>    | -0.32 | 1.73E-06 | 0.18  | 5.54E-03 |
| <i>Atg12</i>    | -0.32 | 1.74E-06 | 0.08  | 2.03E-01 |
| <i>Cyb5r4</i>   | -0.32 | 1.74E-06 | -0.38 | 4.68E-09 |
| <i>Wif1</i>     | -0.32 | 1.74E-06 | -0.10 | 1.45E-01 |
| <i>Nr3c1</i>    | 0.32  | 1.76E-06 | 0.12  | 7.81E-02 |
| <i>Nme3</i>     | 0.32  | 1.77E-06 | 0.31  | 2.55E-06 |
| <i>Brk1</i>     | -0.32 | 1.80E-06 | -0.29 | 7.10E-06 |
| <i>Rab34</i>    | 0.32  | 1.81E-06 | 0.17  | 9.84E-03 |
| <i>Syt11</i>    | 0.32  | 1.82E-06 | 0.20  | 2.16E-03 |
| <i>Chuk</i>     | 0.32  | 1.82E-06 | 0.22  | 9.02E-04 |
| <i>Igf1r</i>    | 0.32  | 1.83E-06 | 0.31  | 1.29E-06 |
| <i>Mterfd2</i>  | 0.32  | 1.83E-06 | 0.26  | 5.13E-05 |
| <i>Rab38</i>    | -0.32 | 1.86E-06 | -0.24 | 3.37E-04 |
| <i>Kcnab2</i>   | -0.32 | 1.87E-06 | -0.17 | 8.51E-03 |
| <i>Bbs2</i>     | 0.32  | 1.87E-06 | 0.30  | 3.02E-06 |
| <i>Spp1</i>     | -0.32 | 1.88E-06 | -0.25 | 1.50E-04 |
| <i>Cebpg</i>    | 0.32  | 1.88E-06 | 0.24  | 2.85E-04 |
| <i>Srek1</i>    | 0.32  | 1.89E-06 | 0.22  | 6.25E-04 |
| <i>Actn1</i>    | -0.32 | 1.89E-06 | -0.29 | 7.12E-06 |
| <i>Kras</i>     | -0.32 | 1.90E-06 | -0.14 | 3.00E-02 |
| <i>Sel1l</i>    | -0.32 | 1.91E-06 | 0.09  | 1.63E-01 |
| <i>Ppp3ca</i>   | -0.32 | 1.92E-06 | -0.29 | 1.05E-05 |
| <i>Rqcd1</i>    | -0.32 | 1.93E-06 | -0.31 | 1.38E-06 |
| <i>Rab27b</i>   | -0.32 | 1.96E-06 | 0.06  | 3.60E-01 |
| <i>Uhrf1</i>    | -0.32 | 1.97E-06 | -0.25 | 1.33E-04 |
| <i>Lingo1</i>   | 0.32  | 1.99E-06 | 0.24  | 2.23E-04 |
| <i>Cept1</i>    | 0.32  | 2.00E-06 | 0.07  | 3.12E-01 |
| <i>Atg3</i>     | 0.32  | 2.01E-06 | 0.18  | 5.81E-03 |
| <i>Gla</i>      | -0.32 | 2.01E-06 | -0.22 | 6.52E-04 |

**Table S3. Mitochondrial-associated genes differentially expressed in gWAT from female FERKO versus Control<sup>fl/fl</sup> mice.** (Functional annotation in Fig. 2D).

| <b>Gene Name</b>     | <b>Transcription Factor</b> |
|----------------------|-----------------------------|
| <i>1700123020Rik</i> | <i>FOXN4</i>                |
| <i>Abce1</i>         | <i>ZF5</i>                  |
| <i>Acadsb</i>        | <i>BEN</i>                  |
| <i>Acp6</i>          | <i>ELK-1</i>                |
| <i>Aldh2</i>         | <i>TEL1</i>                 |
| <i>Atp5c1</i>        | <i>GABPa</i>                |
| <i>Atp5g3</i>        | <i>E2F-3</i>                |
| <i>Car5b</i>         | <i>PEA3</i>                 |
| <i>Clpp</i>          | <i>GABP</i>                 |
| <i>Cox8a</i>         | <i>E2F-4</i>                |
| <i>Dguok</i>         | <i>SP100</i>                |
| <i>Eci2</i>          | <i>E2F</i>                  |
| <i>Fen1</i>          |                             |
| <i>Gstp1</i>         |                             |
| <i>Hibch</i>         |                             |
| <i>Hsd17b10</i>      |                             |
| <i>Iars2</i>         |                             |
| <i>Mfn1</i>          |                             |
| <i>Mpst</i>          |                             |
| <i>Mrpl24</i>        |                             |
| <i>Mrpl42</i>        |                             |
| <i>Mrpl9</i>         |                             |
| <i>Mrps21</i>        |                             |
| <i>Mrps34</i>        |                             |
| <i>Mrps35</i>        |                             |
| <i>Mrps5</i>         |                             |
| <i>Ndufa6</i>        |                             |
| <i>Ndufb9</i>        |                             |
| <i>Ndufs3</i>        |                             |
| <i>Ndufs6</i>        |                             |
| <i>Ndufs7</i>        |                             |
| <i>Ndufv3</i>        |                             |
| <i>Rhbdd1</i>        |                             |
| <i>Sh3bp5</i>        |                             |
| <i>Slc25a24</i>      |                             |
| <i>Sqrdl</i>         |                             |
| <i>Stk11</i>         |                             |
| <i>Stoml2</i>        |                             |
| <i>Syne2</i>         |                             |
| <i>Txn2</i>          |                             |
| <i>Uqcr11</i>        |                             |
| <i>Uqcrh</i>         |                             |
| <i>Wwox</i>          |                             |

**Table S4. Mouse strains studied from the UCLA HMDP. (n=4 mice/strain).**

|             |            |            |
|-------------|------------|------------|
| A/J         | BXD44/RwwJ | BXH20/KccJ |
| AKR/J       | BXD45/RwwJ | BXH22/KccJ |
| AXB12/PgnJ  | BXD48/RwwJ | BXH8/TyJ   |
| AXB15/PgnJ  | BXD49/RwwJ | BXH9/TyJ   |
| AXB19/PgnJ  | BXD5/TyJ   | C3H/HeJ    |
| AXB19a/PgnJ | BXD50/RwwJ | C57BL/6J   |
| AXB19b/PgnJ | BXD51/RwwJ | C57BLKS/J  |
| BALB/cJ     | BXD55/RwwJ | C58/J      |
| BUB/BnJ     | BXD56/RwwJ | CBA/J      |
| BXA11/PgnJ  | BXD6/TyJ   | CE/J       |
| BXA14/PgnJ  | BXD60/RwwJ | CXB11/HiAJ |
| BXA16/PgnJ  | BXD61/RwwJ | CXB12/HiAJ |
| BXA2/PgnJ   | BXD62/RwwJ | CXB13/HiAJ |
| BXA24/PgnJ  | BXD64/RwwJ | CXB4/ByJ   |
| BXA4/PgnJ   | BXD66/RwwJ | CXB6/ByJ   |
| BXA7/PgnJ   | BXD68/RwwJ | CXB7/ByJ   |
| BXA8/PgnJ   | BXD70/RwwJ | DBA/2J     |
| BXD12/TyJ   | BXD71/RwwJ | FVB/NJ     |
| BXD14/TyJ   | BXD73/RwwJ | KK/HIJ     |
| BXD15/TyJ   | BXD74/RwwJ | MA/MyJ     |
| BXD19/TyJ   | BXD75/RwwJ | NOD/ShiLtJ |
| BXD20/TyJ   | BXD79/RwwJ | NZW/LacJ   |
| BXD21/TyJ   | BXD84/RwwJ | PL/J       |
| BXD31/TyJ   | BXD85/RwwJ | RIIIS/J    |
| BXD34/TyJ   | BXD86/RwwJ | SEA/GnJ    |
| BXD38/TyJ   | BXD87/RwwJ | SJL/J      |
| BXD40/TyJ   | BXD9/TyJ   | SM/J       |
| BXD43/RwwJ  | BXH19/TyJ  | SWR/J      |

**Table S5. qPCR primers used to assess gene expression in adipose tissue from WT C57BL/6J, *Esr1* Control<sup>ff</sup>, FERKO, and ERαKO<sup>BAT</sup> mice.**

| <b>Gene Symbol</b> | <b>Forward (5' -&gt; 3')</b> | <b>Reverse (5' -&gt; 3')</b> |
|--------------------|------------------------------|------------------------------|
| <i>18S</i>         | CGCCGCTAGAGGTGAAATTCT        | CGAACCTCCGACTTTTCGTTCT       |
| <i>Acta1</i>       | CCAGCCTTCCTTTATCGGTATG       | CGGTCAGCGATAACCAGGG          |
| <i>Atg12</i>       | CCACAGCCCATTTCTTTGTT         | GAAACAGCCACCCAGAG            |
| <i>Atg3</i>        | ATTCTTCCCCTGTAGCCCAT         | GAAGTGGCCGAGTACCTGAC         |
| <i>Atg5</i>        | ACAGCTTCTGGATGAAAGGC         | TGGGACTGCAGAATGACAGA         |
| <i>Atg7</i>        | GCCAGGTA CTCTGAGCTGT         | ACTTGACCGGTCTTACCCTG         |
| <i>Beclin-1</i>    | CCCCGATCAGAGTGAAGCTA         | AGGAGAGACCCAGGAGGAAG         |
| <i>Ctnnb1</i>      | CAGCTTGAGTAGCCATTGTCC        | GAGCCGTCAGTGCAGGAG           |
| <i>Cav1</i>        | ATGTCTGGGGGCAAATACGTG        | CGCGTCATACACTTGCTTCT         |
| <i>Col6A1</i>      | TCGGTCACCACGATCAAGTA         | CAAGTACTTCGGGAAAGGCA         |
| <i>Dnm1l</i>       | CGTGGACTAGCTGCAGAATG         | TGCCTCAGATCGTCGTAGTG         |
| <i>Esr1</i>        | GCCAGAATGGCCGAGAGAG          | CCCCATAATGGTAGCCAGAGG        |
| <i>Gfm2</i>        | ACCGTCCAACACCCTCAAG          | AAGAACGAGAAAGGGGCATT         |
| <i>Itgam</i>       | CCCCAATTACGTAGCGAATG         | TGCTGCGAAGATCCTAGTTG         |
| <i>Maplc3b</i>     | AATCACTGGGATCTTGGTGG         | AGTCAGATCGTCTGGCTCG          |
| <i>mtCO2</i>       | CTACAAGACGCCACAT             | GAGAGGGGAGAGCAAT             |
| <i>Fis1</i>        | AGGAGCTGGAACGCCTGATTGATA     | AGGATTTGGACTTGGAGACAGCCA     |
| <i>MFF</i>         | GCAGTTGGCAGGCTAAAAAG         | TCAGGTAGCATATGGGGAGG         |
| <i>Mgme1</i>       | TGTTAGGTTCTCCTGGGGTG         | TTTGGAGAGGTGGAAAGAGC         |
| <i>Mrpl9</i>       | GCAACCACCACACCAAGATT         | GATCCAGACAAAGGCAGGAG         |
| <i>Mrps2</i>       | CGGTGAAGTTCAAAGCCAGT         | CCGAGTACACCTGGGACATAA        |
| <i>Mrps24</i>      | GGAAAGGTGCCCATCATAAA         | ACTACATCGCACACCCGAAAG        |
| <i>MFN2</i>        | ATTGATCACGGTGCTCTTCC         | GTCCTGGACGTCAAAGGGTA         |
| <i>MFN1</i>        | GCTTCCGACGGACTTACAAC         | TGAATAACCGTTGGGATGCT         |
| <i>Myod1</i>       | AGGCCGTGGCAGCGA              | GCTGTAATCCATCATGCCATCA       |
| <i>Myog</i>        | CAACCAGGAGGAGCGCGATCTCCG     | AGGCGCTGTGGGAGTTGCATTCACT    |
| <i>Myh4</i>        | AGCTCGTGCTGGATCTTACG         | GCAGGACTTGGTGGACAAAC         |
| <i>Myh6</i>        | CTTCATCCATGGCCAATTCT         | GCGCATTGAGTTCAAGAAGA         |
| <i>Myh7</i>        | CTCAACTGGGAAGAGCATCCA        | CCTCCAGCAAACCTCTGGAGGC       |
| <i>Nrf1</i>        | GAAGTGCCAACCACAGTCAC         | CGTCTGGATGGTCATTTTAC         |
| <i>Opa1</i>        | TCCTGGTGAAGAGCTTCAATG        | TTTGCAGAAGACGGTGAGAA         |
| <i>Park2</i>       | ATCGACCTCCACTGGGAAG          | GCGTAGGTCCTTCTCGACC          |
| <i>Park7</i>       | AACACACCCACTGGCTAAGG         | GTGCCTCCACAATGGCTAGT         |
| <i>Ppia</i>        | AGCCAAATCCTTTCTCTCCAG        | CACCGTGTTCTTCGACATCA         |
| <i>PGC1α</i>       | TGAGGACCGCTAGCAAGTTT         | TGAAGTGGTGTAGCGACCAA         |
| <i>Polg1</i>       | TAGCTGGCTGGTCCAAGAGT         | CGACGTGGAGGTCTGCTT           |
| <i>Polg2</i>       | CCGTTTTCCAGCGTAGTCTC         | TTCTGTGTGGCCTGGCTATT         |



|               |                       |                      |
|---------------|-----------------------|----------------------|
| <i>Polrmt</i> | CTCATCTCAGGTGTGCCCTC  | TCTGCAGCTCAAGAAGGAGC |
| <i>Peo1</i>   | GCCCAGTCACCAGTTTCCTA  | ACTCTGGTCATTACCCCTCG |
| <i>Ppp3cc</i> | GCGATTGATCCCAAGTTGTC  | TGCCCTCCTTCATGAGATGT |
| <i>Pink1</i>  | GGATGTCGTCCTGAAGGGAG  | GCTTCGCTGGAGGAACCTG  |
| <i>Rcan</i>   | TGTGGCAAACGATGATGTCT  | GCAGATAAGGGGTTGCTGAA |
| <i>Sqstm1</i> | TTTCTGGGGTAGTGGGTGTC  | CTGAAGAATGTGGGGGAGAG |
| <i>S1pr3</i>  | TCTTAGCTGAGACACGGCAG  | TCAGGGAACAATTGGGAGAG |
| <i>Sdha</i>   | TACTACAGCCCCAAGTCT    | TGGACCCATCTTCTATGC   |
| <i>Tfam</i>   | AGCTTGTAATGAGGCTTGGA  | AGATGTCTCCGGATCGTTTC |
| <i>Tnni1</i>  | CCCTACTGGGCTCTAAGCACA | GCCTCCACATTCTTCCTCCA |
| <i>Tnni2</i>  | CTGTCAGAACTGCCCCGC    | GCTCCTTGCTGCTCTTCTGC |
| <i>Ulk1</i>   | TAGTCAGCCAGGTCTCCACC  | CTGCTGGGAAAGGAAATCAA |
| <i>Vegfa</i>  | AATGCTTTCTCCGCTCTGAA  | CTCACCAAAGCCAGCACATA |

**Table S6. qPCR primers used for ChIP studies to assess the binding of ER $\alpha$  to the Polg1 proximal promoter in 3T3L1 adipocytes.**

Set 1: F: 5'-GGATAAGGCGTCTGACTTCG-3'; R: 5'-CCCTGACAGTTGTTTGCTCA-3'

Set 2: F: 5'-CTATGGACCGCAAAGGCTAA-3'; R: 5'-GAGCTGGGAGCAGAAACAAC-3'

Set 6: F: 5'-CCCACTGATACCAACCAAGC-3'; R: 5'-GAGGGTCAGAGCAGCTTCAT-3'

Set 7: F: 5'-TGGACCACTACCTGAGTGACC-3'; R: 5'-CTCTTATGAGCCACCCTTGC-3'

Positive control (Pgr):

F: 5'-CCAACATACTTCATGCTGCAC-3'; R: 5'-TTCAGCAAGGCAAGAAACAA-3'

**Data file S1. Raw data from studies of human tissues, cells, and genetically engineered mice. (Excel)**

**Data file S2. Raw data of *ESR1*-correlated genes in subcutaneous fat from men participating in the METSIM study. (Excel)**

**Data file S3. Raw data of *ESR1*-correlated genes in subcutaneous fat from men participating in the MyoGlu study. (Excel)**

**Data file S4. Raw data of *Esr1*-correlated genes in gonadal fat from male mice of the UCLA HMDP. (Excel)**

**Data file S5. Raw data of *Esr1*-correlated genes in gonadal fat from female mice of the UCLA HMDP. (Excel)**

**Data file S6. GO of microarray data performed on gonadal fat from female FERKO and Control<sup>ff</sup> mice. (Excel)**
